# Supplementary material for: Capture, amplification, and global profiling of microRNAs from low quantities of whole cell lysate
Source: Royal Society of Chemistry journal article supplement (doi:10.1039/c7an00670e), 2017-01-01
Supplement: c7an00670e1.xlsx [file c7an00670e1.xlsx]

## Sheet: BaF3 Titration
Analyst #	miRNA	5000 BaF3 cells	5000 BaF3 cells	1500 BaF3 cells	1500 BaF3 cells	500 BaF3 cells	500 BaF3 cells	Water	Luminex beads bacground
Analyte 1	hsa-mmu-miR-125a-5p,v11	24	19	31	24	33	26	24	48
Analyte 2	hsa-mmu-miR-10b,v11	9	7.5	7	6	8	8	8.5	17
Analyte 3	hsa-mmu-miR-107,v11	38	39	16	24	20	11.5	27	11
Analyte 4	hsa-mmu-miR-103,v11	51	48	18	34	25	12	34	12
Analyte 5	hsa-mmu-let-7f,v11	1588.5	1223	751	1742	1123	291	271	17
Analyte 6	hsa-mmu-let-7d,v11	302.5	161	137	306.5	145.5	37	118.5	19
Analyte 7	mmu-miR-101b,v11	6	10	9	8	15	6	8	22
Analyte 8	hsa-miR-320a,mmu-miR-320,v11	32	27	19.5	24	28	9	16.5	12
Analyte 9	hsa-mmu-let-7e,v11	18.5	21	9.5	19	10	7	9	14
Analyte 10	hsa-miR-28-5p,mmu-miR-28,v11	641	657	435	509	517	574	501	19
Analyte 11	hsa-mmu-miR-26b,v11	109	57	44	79	32	28	9	15
Analyte 12	hsa-mmu-miR-136,v11	6	7	10	4	9	8	3	17
Analyte 13	mmu-miR-211,v11	15	15	15	11	14	12	15	28
Analyte 14	hairpin-mmu-mir-199b,v11	5	5	8	4	6	4	6	23
Analyte 15	mmu-miR-217,v11	4	5	8	4	3	4	5	14
Analyte 16	hairpin-hsa-mir-30a,hairpin-mmu-mir-30a,v11	9	11	8	6	5	9	4.5	11.5
Analyte 17	hsa-mmu-miR-29c,v11	50	39	17	38	15	16	10	17
Analyte 18	hsa-mmu-miR-98,v11	90	102	40	126	99	39	65	13
Analyte 19	hsa-mmu-miR-1,v11	2	9	5	4	3	3	2	18
Analyte 20	hsa-mmu-miR-30b,v11	24	11	18	14	11	14	8	19
Analyte 21	hsa-mmu-miR-130a,v11	8	5	4	6	7	3	6	13
Analyte 22	hsa-mmu-miR-142-3p,v11	195	86	35	84	123	30.5	61	15.5
Analyte 23	hsa-mmu-miR-137,v11	8	11	7	5	1	6	4	12
Analyte 24	mmu-miR-201,v11	5	10	6	6	4	5.5	5.5	14
Analyte 25	mmu-miR-202-3p,v11	21.5	28	28	22.5	21	19	19.5	47
Analyte 26	hsa-mmu-miR-206,v11	5	9	4	7	6	4	4	14
Analyte 27	mmu-miR-207,v11	14.5	20	13	10	9	14	10	19
Analyte 28	hsa-mmu-miR-208a,v11	5	8	4	5	8	8	6	13
Analyte 29	hsa-mmu-miR-212,v11	1238	1268	852	1010	1031	1186	982	15
Analyte 30	hsa-mmu-miR-216a,v11	3	6	8	6	5.5	4.5	4.5	20
Analyte 31	hsa-mmu-miR-218,v11	5	9.5	8.5	5	6	7	8	12
Analyte 32	hsa-mmu-miR-34a,v11	4	6	8	5	7	4	5	12
Analyte 33	hsa-miR-211,v11	14	8	12	10	11	12	10	17
Analyte 34	hsa-miR-215,v11	7	8	12	6	4.5	5	5.5	13
Analyte 35	hsa-miR-217,v11	6	7	9	4	6	2	5	16
Analyte 36	hsa-mmu-miR-17,v11	154	101	58	98	73	40	78	20
Analyte 37	hsa-mmu-miR-18a,v11	20	15	14	12	13	12	14	22
Analyte 38	hsa-mmu-miR-181a,v11	939	405.5	312	631	459	168	125	23
Analyte 39	hsa-mmu-miR-181b,v11	212	147	104	129	146	45	78	18
Analyte 40	hsa-mmu-miR-199a-5p,v11	514	561	530	462	559	565	420	27.5
Analyte 41	hsa-miR-199b-5p,v11	9	11	7	5	7	7	3	15
Analyte 42	hsa-mmu-miR-19a,v11	34	14	8	18.5	3	4	12	15
Analyte 43	hsa-mmu-miR-203,v11	5	9	2	3	8	8	6	12.5
Analyte 44	hsa-mmu-miR-204,v11	8	11	6.5	5	7	5	5	15
Analyte 45	hsa-mmu-miR-205,v11	7	18	11	8	6	6	9.5	27
Analyte 46	hsa-mmu-miR-210,v11	6	11	7	7	6.5	8	6	14
Analyte 47	hsa-mmu-miR-214,v11	8	6	9.5	6	7	5	3	22
Analyte 48	hsa-mmu-miR-100,v11	9	5	8.5	8.5	11	7	9	21.5
Analyte 49	hsa-miR-106a,v11	96	70	44	63	54	37	56.5	40
Analyte 50	hsa-mmu-miR-10a,v11	9	17	14	3	8.5	9	0	14
Analyte 51	hsa-mmu-miR-122,v11	6	9	7	8	6	3	6	14
Analyte 52	mmu-miR-126-5p,hairpin-hsa-mir-126,v11	10	6.5	10	9	4	6	6	22
Analyte 53	hsa-mmu-miR-130b,v11	42.5	31	25	61	29	18	18	14
Analyte 54	old_hmr-miR-134_rfam7.0	4	9	7.5	3	5	6	6	18
Analyte 55	hsa-mmu-miR-142-5p,v11	46	27	18	29	28	8	9	14
Analyte 56	mmu-miR-155,v11	100	65	24	81	23	20	18	14
Analyte 57	hsa-mmu-miR-15b,v11	65	30	16.5	41	30	8	8	12
Analyte 58	hsa-mmu-miR-181c,v11	24	16	17	17	16	8	12	15
Analyte 59	hsa-mmu-miR-15a,v11	12	12	14	7	6	8	9	15.5
Analyte 60	hsa-miR-768-3p,v11	6.5	0	9	8	7	5	3	15
Analyte 61	hsa-mmu-let-7g,v11	941	613	253	687.5	331.5	150.5	371	17.5
Analyte 62	hsa-mmu-miR-92a,v11	1034.5	415	320	687	534	160	68	30
Analyte 63	hsa-mmu-miR-146a,v11	3358.5	1892	1133	1973	1217	449	111	21
Analyte 64	hsa-mmu-let-7c,v11	1211	764	515	1738.5	811	318	488	13
Analyte 65	hsa-miR-7,mmu-miR-7a,v11	37	34	14	33	23	8	21	16
Analyte 66	hairpin-hsa-mir-9,hairpin-mmu-mir-9,v11	12.5	7	10	12	10	9	9	20
Analyte 67	hsa-mmu-let-7i,v11	897.5	598.5	262	688	382	150.5	188	16
Analyte 68	hsa-mmu-let-7a,v11	1203	900	501.5	1487	697.5	252.5	352	17
Analyte 69	hsa-mmu-let-7b,v11	735	452	309	883	545	203	319.5	27
Analyte 70	hsa-mmu-miR-132,v11	882.5	863	564	681	653	786	647	16
Analyte 71	hsa-mmu-miR-324-5p,v11	15	10	14	6	8	1	8	25
Analyte 72	hsa-mmu-miR-124,v11	5.5	11	11	5	4	6	8	23
Analyte 73	hsa-miR-125b,mmu-miR-125b-5p,v11	8	14	10.5	7	8	7	8	15
Analyte 74	hsa-mmu-miR-99a,v11	9	21	19	10	14.5	12	12	23
Analyte 75	hsa-mmu-miR-16,v11	1182	547	300	654.5	494	198.5	85	20
Analyte 76	hsa-mmu-miR-29b,v11	50	48	26	26.5	22	14	10	17
Analyte 77	hsa-miR-101,mmu-miR-101a,v11	17	13	11	9	13	11	11	17
Analyte 78	hsa-miR-105,v11	10	8	8	7	10	9	8	14
Analyte 79	hsa-mmu-miR-106b,v11	15	22	13	13.5	17	11	20	22
Analyte 80	hsa-miR-126,mmu-miR-126-3p,v11	21	4.5	14	7	12	10	9	35
Analyte 81	hsa-miR-127-3p,mmu-miR-127,v11	8	10	9	9	9	9	12	17
Analyte 82	hairpin-hsa-mir-24,hairpin-mmu-mir-24,v11	13.5	13	9	16.5	5.5	13	11	14
Analyte 83	hsa-mmu-miR-200c,v11	10	17	10.5	11	10.5	9	12	25.5
Analyte 84	hsa-miR-224,v11	8	14	13	11	10.5	9	9	24
Analyte 85	hsa-mmu-miR-25,v11	235	164	70	171	91	36	36	21
Analyte 86	hsa-mmu-miR-27a,v11	525	402.5	257	344	313	324	266	20
Analyte 87	hsa-mmu-miR-296-5p,v11	11	9	13	11	12	11	10	18
Analyte 88	hsa-miR-299-5p,hairpin-mmu-mir-299,v11	419	383	200	277	270	329	275.5	18
Analyte 89	hsa-mmu-miR-301a,v11	17	15	13	14	10	9	13.5	20
Analyte 90	hsa-mmu-miR-302a,v11	9	16.5	8.5	11	11	11	12	18.5
Analyte 91	hsa-mmu-miR-30a,v11	23	18	19	19	18	31	11	22
Analyte 92	hsa-mmu-miR-30e,v11	31	17.5	20	18	14	19	17	21
Analyte 93	hsa-mmu-miR-31,v11	21	19	16.5	16	16	16	15.5	24
Analyte 94	hsa-mmu-miR-32,v11	14	20.5	14	16.5	11	12	18	29
Analyte 95	hairpin-hsa-mir-34b,v11	19	20	19	17	17	15	22.5	27
Analyte 96	hsa-miR-34c-5p,mmu-miR-34c,v11	54	22	27	39	19	20	35	24
Analyte 97	hsa-mmu-miR-93,v11	331	144	61	202	123	56	54	23
Analyte 98	hsa-miR-95,v11	12	17	17	12	16	13	14	21
Analyte 99	hsa-mmu-miR-129-5p,v11	12	13	12	15	14	11.5	13	19
Analyte 100	hairpin-hsa-let-7d,hairpin-mmu-let-7d,v11	35	15	18	15	16	15	18	27
Analyte 103	mmu-miR-106a,v11	461	478.5	392	395	426	420	341	7.5
Analyte 104	hsa-mmu-miR-135b,v11	6	6.5	10	4	6	6	7	15
Analyte 108	mmu-miR-151-3p,v11	5	8	6	5	2	7	10	17
Analyte 109	hairpin-mmu-mir-17,v11	6	13	7	3	6	8.5	5	13
Analyte 112	mmu-miR-224,v11	8	3	9	5	8	7.5	3	15
Analyte 117	hairpin-mmu-mir-290,v11	10	20.5	5	7	7	4	7	18
Analyte 118	mmu-miR-291a-3p,v11	11	10	11	6	8	8.5	6	16
Analyte 119	mmu-miR-291a-5p,v11	9	11	7.5	6	7.5	9	5	23
Analyte 120	mmu-miR-292-3p,v11	20	17	15	11	15	12	11	23.5
Analyte 124	mmu-miR-292-5p,v11	11	3	9	10	11	9	11	23
Analyte 128	mmu-miR-293,v11	1017	1064	869	879	911	993	735.5	20
Analyte 134	mmu-miR-294,v11	12	18	10	15	11	12	14	26.5
Analyte 135	mmu-miR-295,v11	14	19.5	15	10.5	15	14	9	26
Analyte 137	hsa-miR-297,mmu-miR-297a,v11	5	11	19.5	21	4	17	0.5	15
Analyte 141	mmu-miR-298,v11	24	23	20.5	20.5	21	14	16.5	24
Analyte 142	mmu-miR-300,v11	11	20.5	9	15.5	6	15.5	12.5	26
Analyte 150	hsa-mmu-miR-323-3p,v11	11	12.5	27.5	13	11.5	15	23	39
Analyte 156	hsa-miR-324-3p,hairpin-mmu-mir-324,v11	8	5	10.5	4	6	3	8	13
Analyte 158	hairpin-mmu-mir-325,v11	3	8	9	4	9	7	7	18
Analyte 160	hsa-mmu-miR-326,v11	3	7	8	6	10	5	5	14
Analyte 161	hsa-mmu-miR-328,v11	18	17	12	17	21	8	9.5	17
Analyte 162	mmu-miR-329,v11	5.5	9	8	4	7	7	7	12.5
Analyte 163	hsa-mmu-miR-331-3p,v11	4	9	4	5	6	6	6	12
Analyte 164	mmu-miR-337-3p,v11	4	6.5	7	4	7	7	3	14
Analyte 165	hsa-mmu-miR-338-3p,v11	4	3	4	5	8	9	2	14
Analyte 166	ebv-miR-BART1-5p,v11	6.5	9	7	3	7	6	6.5	15.5
Analyte 168	hsa-mmu-miR-339-5p,v11	11	12	12	8	11	6	8	16
Analyte 170	mmu-miR-340-3p,hairpin-hsa-mir-340,v11	6	6	9	5	6	4	7	12
Analyte 171	hairpin-mmu-mir-341,v11	8.5	5.5	9	8	6	3	10	12
Analyte 172	hsa-mmu-miR-342-3p,v11	18	23	11	15	17	14	13	14
Analyte 173	mmu-miR-344,v11	9	7.5	8	5	4	7.5	3.5	12
Analyte 174	hairpin-mmu-mir-345,v11	7	12	7	3	9	8.5	5.5	15
Analyte 175	mmu-miR-346,v11	11	14.5	8.5	8	8	7	12	15
Analyte 186	hairpin-mmu-mir-34b,v11	15	14.5	12	10	8	9.5	14	18
Analyte 188	mmu-miR-350,v11	13	24	13.5	13	13	14	15	27
Analyte 189	mmu-miR-351,v11	9	15.5	8	11.5	8	12	8	20
Analyte 202	mmu-miR-7b,v11	9	20	13	14.5	20	17.5	12	25
Analyte 207	old_r-miR-20*_rfam7.0	18.5	22	13.5	17	18	16	18.5	21
Analyte 213	old_r-miR-327_rfam7.0	18.5	23	23	19	15.5	24	25.5	30
Analyte 215	old_r-miR-333_rfam7.0	4	10	11	5	3	4	2	12.5
Analyte 216	hsa-miR-335,mmu-miR-335-5p,v11	10	14	4	6	4	7	5.5	13.5
Analyte 220	hairpin-hsa-mir-7,hairpin-mmu-mir-7a,v11	45	48	26	31	28	31	30	13.5
Analyte 221	hsa-mmu-miR-200a,v11	6	1	8.5	8	5	4.5	4	13
Analyte 222	hsa-mmu-miR-194,v11	8	4	5	6	5	5	7	14
Analyte 223	old_hmr-miR-191_rfam7.0	39	20	19	18	15	10	10	18
Analyte 224	hsa-mmu-miR-190,v11	7	15	6	5	18	7	4	17
Analyte 226	hsa-mmu-miR-186,v11	15	13	13	8	24	4	5	13
Analyte 229	hairpin-hsa-mir-185,hairpin-mmu-mir-185,v11	12	12	8	14	10.5	6	13	16
Analyte 230	hsa-mmu-miR-184,v11	8	8	5	4.5	8.5	9	6	15
Analyte 237	hsa-mmu-miR-133b,v11	11.5	7	13.5	12	9	8	10	22.5
Analyte 239	hsa-miR-151-3p,v11	7	11	11	9	9	10	9	15
Analyte 240	hsa-mmu-miR-196b,v11	11	15	13	9	8	10	7.5	19
Analyte 246	hsa-mmu-miR-370,v11	8	16	14	8	12	11	10	17.5
Analyte 247	hsa-miR-371-3p,v11	9	17	15	12	12	13	11	18
Analyte 248	hsa-miR-372,v11	16	11.5	13	11	10	11	12	20.5
Analyte 253	hsa-miR-373,v11	11	19	12	14	13	13	13	22
Analyte 256	hairpin-hsa-mir-373,v11	15	16.5	14	15	17	15	17	22
Analyte 264	hsa-miR-374a,v11	21	16	19	20	20	23	16	24
Analyte 276	mmu-miR-215,v11	7	15.5	5	6	3	4	4	16.5
Analyte 286	hsa-mmu-miR-409-3p,v11	6.5	13.5	10	5	10	6	7	18
Analyte 287	hsa-mmu-miR-410,v11	5.5	12	8	7	9	5	11	18
Analyte 288	mmu-miR-376b,v11	8	16	9	9	9.5	8	6	17
Analyte 289	mmu-miR-376a,v11	7	12	9	7	7	7	9	15.5
Analyte 290	hairpin-hsa-mir-411,hairpin-mmu-mir-411,v11	12	11	16	8	9.5	11	9	21
Analyte 291	mmu-miR-380-3p,v11	7	8	11	8	10	7	7	16.5
Analyte 292	hsa-miR-412,hairpin-mmu-mir-412,v11	9	10	9	9	8	8	8	18
Analyte 293	hsa-mmu-miR-27b,v11	88	63	51	67	54	34.5	24	16
Analyte 294	hsa-mmu-miR-26a,v11	458.5	177	137	214.5	230	71	18	21
Analyte 295	hsa-mmu-miR-24,v11	338	120.5	133.5	219	141	73	45.5	19
Analyte 296	hsa-mmu-miR-23b,v11	59	28	16.5	24	15.5	14	18	16
Analyte 297	hsa-mmu-miR-23a,v11	47	18	16	28	18	15	15.5	23
Analyte 298	hsa-miR-220a,v11	14	17	19	12	8	14	10	18
Analyte 299	hsa-mmu-miR-22,v11	109	42	39	46	65	14.5	19.5	23
Analyte 300	hairpin-hsa-mir-181a,hairpin-mmu-mir-181a,v11	10	13	12	10	10	11	12	22
Analyte 301	hsa-mmu-miR-21,v11	2093	1462	624	1484	887	349	670	16
Analyte 302	hsa-mmu-miR-20a,v11	183	69.5	30	64	33	23	42	17
Analyte 303	hsa-mmu-miR-19b,v11	101	50.5	29	54	43	18	21	22.5
Analyte 304	hsa-mmu-miR-196a,v11	13	13.5	14	12	11	11	9	15
Analyte 305	hsa-mmu-miR-148a,v11	15	28	22	13	15	19	17	20
Analyte 306	hsa-mmu-miR-145,v11	32	23	18	20	18	15	22	23
Analyte 307	hsa-mmu-miR-144,v11	26.5	21	21	27.5	14	12	19	21
Analyte 308	hsa-mmu-miR-143,v11	15	11.5	15	13	13	13	13	17
Analyte 309	hsa-mmu-miR-141,v11	16	22	16	14	11	13	13	14
Analyte 310	hsa-miR-140-5p,mmu-miR-140,v11	19	20	15.5	17	14	15	15	19
Analyte 311	hsa-mmu-miR-139-5p,v11	38	38	28	29	29	34	33	27
Analyte 312	hairpin-hsa-mir-138,hairpin-mmu-mir-138,v11	19	17	16	13	16	18	15	25
Analyte 313	hsa-mmu-miR-135a,v11	15	12	17	14	17	14	13	23
Analyte 314	hairpin-hsa-mir-133a,hairpin-mmu-mir-133a,v11	17	16.5	13	16	18	13	16	23
Analyte 315	hsa-mmu-miR-128,v11	28.5	29.5	26	22	21	22	21	30
Analyte 316	hsa-mmu-miR-128,v11	23	18.5	23	20	21	20	20	32
Analyte 317	hsa-miR-219-5p,mmu-miR-219,v11	15	15	19	18	17	14	17	24
Analyte 318	hsa-mmu-miR-221,v11	1079	775	366	871.5	539.5	210.5	336	22
Analyte 319	hsa-mmu-miR-222,v11	315	218	115.5	231	112	40	39	31.5
Analyte 320	hsa-mmu-miR-223,v11	28	20	29	26	20	21	24.5	32
Analyte 321	hsa-miR-33a,mmu-miR-33,v11	15	20.5	17	15	17	13	14	21
Analyte 323	hsa-mmu-miR-96,v11	51	43.5	51.5	46	43	36	44	67
Analyte 324	hsa-mmu-miR-9,v11	29	27	22	23	23.5	20	22	28
Analyte 325	hsa-mmu-miR-30d,v11	96	32.5	15	28	19	9	11	15
Analyte 326	hairpin-hsa-mir-10b,hairpin-mmu-mir-10b,v11	10	14	5	5.5	8	6	8	13
Analyte 327	hsa-mmu-miR-188-5p,v11	7	7.5	8.5	7	6	8	6	11
Analyte 328	hsa-miR-193a-3p,mmu-miR-193,v11	8	10	9	9	8	12	11	13
Analyte 330	hsa-miR-198,v11	10	15	7	8	10	7	12	14
Analyte 331	hsa-mmu-miR-192,v11	10	13.5	9	6	6.5	3	7.5	12
Analyte 332	hsa-mmu-miR-187,v11	10	10	10	8	7	6	8	18
Analyte 333	hsa-mmu-miR-183,v11	95	111	118	101	124	113	94	14
Analyte 334	hsa-mmu-miR-182,v11	7	8	6	5.5	4	8	10	14
Analyte 335	hsa-mmu-miR-154,v11	11	8	7	6	2.5	8	8	10
Analyte 336	hsa-mmu-miR-153,v11	12	2	6	7	4	10	4.5	15
Analyte 338	hsa-mmu-miR-152,v11	5	12	7	7	5	8	9	10
Analyte 339	hsa-mmu-miR-150,v11	12	9	10	8	9	7	10	25.5
Analyte 340	hsa-mmu-miR-149,v11	17	13	15	15	10	10	15	24
Analyte 341	hsa-mmu-miR-148b,v11	12	16	8	9	18	5	10	12
Analyte 342	hsa-mmu-miR-30c,v11	123.5	49	51	74	37	25	34	22
Analyte 343	hairpin-hsa-mir-29a,hairpin-mmu-mir-29a,v11	362	211	91	302.5	67.5	53.5	26	25
Analyte 344	hsa-mmu-miR-200b,v11	6.5	11	7.5	6	8	5.5	6	20
Analyte 345	hairpin-hsa-mir-199b,hairpin-mmu-mir-199b,v11	6	0	12	9	10	12	8	21
Analyte 346	hsa-mmu-miR-197,v11	16	17	11	13	15	13	14	17
Analyte 347	hsa-mmu-miR-195,v11	13	14	8	10	13	9	12	18
Analyte 348	hsa-mmu-miR-99b,v11	25	22	26	18	19.5	25.5	23	18
Analyte 349	hsa-mmu-miR-433,v11	11.5	8	16	12	9	13	7	13
Analyte 350	hsa-mmu-miR-431,v11	10.5	15.5	9	13	8	9	7	17.5
Analyte 351	hsa-mmu-miR-365,v11	14	15	18	14	15	14	10	20
Analyte 352	hairpin-hsa-mir-450a,hairpin-mmu-mir-450a,v11	18.5	20.5	20	14	12	14	14.5	18.5
Analyte 353	hsa-mmu-miR-449a,v11	23	19	17.5	19	23	20	11.5	20
Analyte 354	hsa-mmu-miR-448,v11	11	17	15	13	17	16.5	14	23
Analyte 355	hsa-miR-424,v11	128	58	55	51	54.5	15	40	21
Analyte 356	hsa-miR-361-5p,mmu-miR-361,v11	76	99	211	209	51	245	96	23
Analyte 357	hsa-mmu-miR-375,v11	14.5	19	19	14	15	17	14	19.5
Analyte 358	hsa-mmu-miR-377,v11	14	18	13	14	12	12	13	22.5
Analyte 359	hairpin-hsa-mir-378,hairpin-mmu-mir-378,v11	26	26	28	19.5	20	19	22	19.5
Analyte 360	hsa-mmu-miR-379,v11	15	19	19	17	17	14	17	24.5
Analyte 361	hairpin-hsa-mir-380,hairpin-mmu-mir-380,v11	13	15	21	16	12.5	15	20	22
Analyte 362	hsa-mmu-miR-381,v11	15	16	15	16	16	16	18	25
Analyte 363	hsa-mmu-miR-382,v11	18	23	17	19	16	17.5	12.5	20
Analyte 364	hsa-miR-384,v11	19	24.5	20	18	17	15	16	31
Analyte 365	hairpin-hsa-mir-425,hairpin-mmu-mir-425,v11	16	23.5	20	15	18	15	15	26
Analyte 366	mmu-miR-452,hairpin-hsa-mir-452,v11	20	20	21	23	20	20	21	31
Analyte 367	hairpin-hsa-mir-30e,hairpin-mmu-mir-30e,v11	27	21	25	22	19	22	23	24
Analyte 368	hsa-mmu-miR-129-3p,v11	10	15	17	15	14	15	16	24
Analyte 369	mmu-miR-429,v11	18	24	21	19	17	20	17	28.5
Analyte 370	hairpin-mmu-mir-330,v11	19.5	25	24	21	25	16	20	28
Analyte 371	hairpin-mmu-mir-322,v11	21	25	22	21	18	23	17	26
Analyte 373	mmu-miR-383,v11	18	20	17	20	17	17	20	27
Analyte 374	old_r-miR-297_rfam7.0	17	26	22	20	22	22	19	30
Analyte 376	hairpin-hsa-mir-421,hairpin-mmu-mir-421,v11	7	1	4	3	4	3	5	10
Analyte 377	hairpin-mmu-mir-463,v11	6	13	6	4	5	5	5	14
Analyte 379	mmu-miR-464,v11	10	8	5	4	5.5	6	3	12
Analyte 381	mmu-miR-465a-5p,v11	9	6	9	7	12.5	9	4	15
Analyte 382	hairpin-mmu-mir-466a,v11	12	9	9.5	10	8	3	2	14
Analyte 384	hairpin-mmu-mir-467a,v11	10	17	7	7	6	5	6	17
Analyte 387	mmu-miR-468,v11	14.5	13	8	7	7	5.5	12	16
Analyte 388	mmu-miR-469,v11	10	17	16	11	10	11	9	19
Analyte 390	mmu-miR-470,v11	11	11	10	8	9	10	9	19
Analyte 391	mmu-miR-471,v11	9	15	15	11	10	12	12	18
Analyte 392	hairpin-mmu-mir-434,v11	11	18	9.5	10	13	12	7	17
Analyte 393	mmu-miR-434-3p,v11	21	14	15	13	15	8	10	22
Analyte 396	hairpin-hsa-mir-433,hairpin-mmu-mir-433,v11	10	13	15	9	12	13	10	19
Analyte 399	old_r-miR-336_rfam7.0	19	16	20	14	19	17	17.5	18
Analyte 401	old_r-miR-343_rfam7.0	12	11	14	12	11	13	12	20.5
Analyte 402	old_r-miR-344_rfam7.0	14.5	13	14	14	12	10	13	27
Analyte 404	old_r-miR-346_rfam7.0	21	27	19	22	17	18	19	23
Analyte 405	old_r-miR-347_rfam7.0	20	17	18	16	20	12	16	21
Analyte 407	old_r-miR-349_rfam7.0	18	26	15.5	18	14	16	15.5	22
Analyte 408	old_r-miR-352_rfam7.0	36	29	33	36	27.5	20.5	27	23
Analyte 409	hsa-mmu-miR-423-3p,v11	45	24	20	34	15	14	17	22
Analyte 412	hsa-miR-18b,v11	22	17	13	15	15	19	16	23
Analyte 413	hsa-mmu-miR-20b,v11	22	25	22	20	21	23.5	23.5	28
Analyte 415	hairpin-hsa-mir-191,v11	13.5	8	10	6.5	10	5.5	6	14
Analyte 417	hairpin-hsa-mir-154,hairpin-mmu-mir-154,v11	3	7	7	7	4	6	8	21
Analyte 419	hsa-miR-147,v11	7	15	7	6	8	4	5	15
Analyte 425	hsa-miR-155,v11	16	16.5	13	16	10	9	12	21
Analyte 426	hairpin-hsa-mir-17,v11	8	5	8.5	8	9	8	9	15
Analyte 428	hairpin-hsa-mir-200a,hairpin-mmu-mir-200a,v11	10	18	13	10	9	9	12	17
Analyte 430	hairpin-hsa-mir-302a,v11	10	18	11	9	11	7	9	18
Analyte 431	hsa-miR-299-3p,v11	11	19.5	11	12	10	11	13	19
Analyte 433	hairpin-hsa-mir-182,hairpin-mmu-mir-182,v11	36	35	25	28.5	28	33.5	27.5	22
Analyte 438	hsa-mmu-miR-302b,v11	13	20	17	11	13	13.5	15	21
Analyte 439	hairpin-hsa-mir-302b,v11	11	14.5	14	12	13	10	11	23
Analyte 441	hsa-mmu-miR-302c,v11	17	19	15	15.5	13.5	14.5	16	26
Analyte 451	hairpin-hsa-mir-302c,v11	6	7	7	8	10	7	10	18.5
Analyte 452	hsa-mmu-miR-302d,v11	10	14	10	9	9	7	6	15
Analyte 455	hsa-miR-325,v11	7	14	15	7	11	9	9	16
Analyte 456	hairpin-hsa-mir-337,v11	9	11	11.5	8	10	7	8.5	23
Analyte 459	hairpin-hsa-mir-345,v11	8.5	8	12	7	12	11	8.5	25
Analyte 461	hsa-miR-346,v11	10	17	15	13	11	10	12	30
Analyte 467	hsa-mmu-miR-367,v11	11	15	14	12	12	12	15	25
Analyte 468	hairpin-hsa-mir-376c,v11	12	14	15	11	13	12	12	25
Analyte 472	hsa-mmu-miR-369-3p,v11	17	19.5	19	14	14	13	13	27
Analyte 474	hsa-miR-383,v11	8	10	11	6	3.5	8	8	18
Analyte 475	hsa-miR-330-3p,v11	9	14	10	9	11	9	11	17
Analyte 481	precontrol5	17	16.5	14	14	15	13	17	23
Analyte 485	precontrol4	16	15	17	17	18	15	16	28
Analyte 487	precontrol3	30	32	32	29	33	34	25	30.5
Analyte 488	postcontrol-PTG20210	6269	6110	6453	6097	6365	6024	6113.5	6636
Analyte 489	ebv-miR-BART2-5p,v11	26	24	26	24	24	24	23	28
Analyte 492	postcontrol-MRC677	8975	8978	9515.5	9097	9384	8644	9012.5	10141
Analyte 494	postcontrol-FVR506	7750	7659	8636.5	7779.5	8310	7401	7556	9373.5
Analyte 495	hsa-miR-429,v11	4	6.5	10	8	11	0	12.5	13
Analyte 496	hsa-miR-376a,v11	4	6	2	7	2	5	8	13
Analyte 497	hairpin-hsa-mir-378,hairpin-mmu-mir-378,v11	42	25	13	38	9	13	37	15
Analyte 498	hsa-miR-380,v11	5	5	4	3	6	4	11	13
Analyte 499	hairpin-hsa-mir-422a,v11	11	8.5	9	11	7	7.5	14	11
Analyte 500	hsa-miR-329,v11	8	7	6	5	7	5	7.5	18
Analyte 501	hairpin-hsa-mir-453,v11	847.5	804	830	749	441	882	573.5	18
Analyte 502	hairpin-hsa-mir-452,v11	2	10	4	6	4	0	7	15
Analyte 503	hsa-mmu-miR-409-5p,v11	9	6	6	6	7	7.5	6	13
Analyte 504	hsa-miR-376b,v11	8	4	4	6	8	9	12	16
Analyte 505	hsa-miR-485-5p,mmu-miR-485,v11	7	7	7	6	5	5	10	14
Analyte 506	hsa-miR-485-3p,hairpin-mmu-mir-485,v11	7	1	6	3	5.5	5	9	22
Analyte 507	hairpin-hsa-mir-488,v11	7	7	7	6	5	8	6.5	13.5
Analyte 508	hsa-miR-489,v11	4.5	8	5	5	6	4	3	20
Analyte 509	hsa-miR-490-3p,mmu-miR-490,v11	6	5	5.5	2.5	4	4	3	15
Analyte 510	hsa-miR-491-5p,mmu-miR-491,v11	3	6.5	6	5	8	2.5	9	14.5
Analyte 511	hsa-miR-511,v11	11	9	7	8	8	9	9	16
Analyte 512	hsa-miR-146b-5p,mmu-miR-146b,v11	2208.5	1117	466	1026	360	137.5	127	15.5
Analyte 513	mmu-miR-202-5p,hairpin-hsa-mir-202,v11	4	6	6	8	4	7	7	15.5
Analyte 514	hsa-miR-202,v11	3	4	7	5	5	4	7	15
Analyte 515	hsa-miR-492,v11	3	5	6	4	4	1	9	16
Analyte 516	hairpin-hsa-mir-493,hairpin-mmu-mir-493,v11	7	9.5	4	4	6.5	5	6	13
Analyte 517	hairpin-hsa-mir-432,v11	6	4	3	3	4	3.5	7	15
Analyte 518	hsa-mmu-miR-494,v11	6	4	5	4	6	5	7	13
Analyte 519	hairpin-hsa-mir-496,hairpin-mmu-mir-496,v11	8.5	9	7	9	5	7	9.5	20
Analyte 520	hsa-miR-193b,v11	11.5	8	4	11	8	8	12	20
Analyte 521	hsa-mmu-miR-497,v11	7	7	6	7	5	6	11	19
Analyte 522	hsa-mmu-miR-181d,v11	23	17	14	16	14	6	18	12
Analyte 523	hsa-miR-512-5p,v11	6	7	5	6	5	7	9	14
Analyte 524	hsa-miR-512-3p,v11	5	6	4	7	5	6	7	17
Analyte 525	hsa-miR-498,v11	8	7	8.5	2	1	2	6	13
Analyte 526	hsa-miR-520e,v11	5	7	4	5	6	5	5.5	13
Analyte 527	hairpin-hsa-mir-519e,v11	4	8	7	5.5	6	6	5	14
Analyte 528	hairpin-hsa-mir-519e,v11	7	6	3	5	4	7	7.5	16
Analyte 529	hsa-miR-519c-3p,v11	6	4	7	4	4	7	6	9.5
Analyte 530	hsa-miR-520a-5p,v11	10	10	7	6	7	5	11	18
Analyte 531	hsa-miR-520a-3p,v11	4	6	6	5	6	7	7	17
Analyte 532	hsa-miR-526b,v11	8	9	5	9	8	6	12	21
Analyte 533	hairpin-hsa-mir-526b,v11	5	6	7	9	6	5	8	19
Analyte 534	hsa-miR-519b-3p,v11	8	0	5	12	4.5	3	9	18
Analyte 535	hsa-miR-525-5p,v11	7	5	5	6	7	4	8	16
Analyte 536	hsa-miR-525-3p,v11	7	6	7	5	6	5	9	14
Analyte 537	hairpin-hsa-mir-518f,v11	6	6	7	3	7	10	7	12
Analyte 538	hairpin-hsa-mir-518f,v11	4	4	4	3	5	5	11	14
Analyte 539	hairpin-hsa-mir-518c,v11	3	6	7	7	6	4	10	18
Analyte 540	hsa-miR-518c,v11	3	4	5	2	5	5	8	13
Analyte 541	hsa-miR-524-5p,v11	5	7.5	7	3	5	5	9	18
Analyte 542	hsa-miR-524-3p,v11	8	8	6	8	7	9	8.5	20
Analyte 543	hairpin-hsa-mir-517c,v11	8	9.5	9.5	9.5	11	7	11	21.5
Analyte 544	hsa-miR-520d-5p,v11	7	8	4.5	5	6	7	5	15
Analyte 545	hsa-miR-520d-3p,v11	7	7	6	6	6	6	8	15
Analyte 546	hsa-miR-520g,hsa-miR-520h,v11	8.5	8	6	6	5	6	7	18
Analyte 547	hsa-miR-516a-3p,hairpin-hsa-mir-516b,v11	12	11	9	11	11.5	11	10	14
Analyte 548	hsa-miR-518d-3p,v11	7	3	5	8	6	9	9	21
Analyte 549	hairpin-hsa-mir-518a,v11	9	8	6	7	7	5	9	14
Analyte 550	hsa-miR-517c,v11	9	10	5	6	7	5.5	8	17
Analyte 551	hsa-miR-499-5p,mmu-miR-499,v11	7	8	8	7	6.5	5	9	13
Analyte 552	hairpin-hsa-mir-500,v11	7	7	8	9	6	8	11	15
Analyte 553	hsa-miR-501-5p,v11	9	5	7	9	7	7	7	19
Analyte 554	hsa-miR-770-5p,v11	4.5	3.5	4.5	4	12	9	14	15
Analyte 555	hsa-miR-502-5p,v11	12.5	12	9	11.5	7	10	10	15.5
Analyte 556	hsa-miR-503,v11	15	13	13	12	13	15	15	15
Analyte 557	hsa-mmu-miR-504,v11	13.5	8.5	11.5	9	9	9	12	16
Analyte 558	hsa-miR-513a-5p,v11	9	7	8	9	9	7	15	16
Analyte 559	hsa-miR-506,v11	34	31	24	25	22	28	19	14
Analyte 560	hsa-miR-507,v11	8	6	6	7	7	7	9.5	19
Analyte 561	hsa-miR-508-3p,v11	8	8	9	6	8	7	10	14
Analyte 562	hsa-miR-509-3p,v11	7	8	10	9	9	6	12	21
Analyte 563	hsa-miR-510,v11	14	16	15	13	13	13	15	25
Analyte 564	hsa-miR-514,v11	12	10	9	8	9	12	8	13
Analyte 565	hairpin-ebv-mir-bhrf1,v11	13	9	12	7.5	13.5	6.5	14	19
Analyte 566	hairpin-ebv-mir-bhrf1,v11	5	4	6	3	8	5	4	15
Analyte 567	ebv-miR-BHRF1-3,v11	11	10	7	6	7	9	10	15
Analyte 568	hsa-miR-618,v11	683.5	626	584	613	433	734	360	19
Analyte 569	hsa-miR-522,v11	8	10	7	7	8	8	9	15
Analyte 570	hsa-mmu-miR-495,v11	8	6	6	9	8	8	11.5	17
Analyte 571	hsa-mmu-miR-543,v11	8	9	11	8	9	7	15	17
Analyte 572	hsa-mmu-miR-451,v11	8	8	10	8	9	7	11	18
Analyte 573	hairpin-hsa-mir-518e,v11	440	404	439	410	302.5	446.5	281	17
Analyte 574	hsa-miR-519a,v11	8	8	9	9	9	8	10	17
Analyte 575	hairpin-hsa-mir-527,v11	9	7	9	11	9	11	11.5	18
Analyte 576	hsa-mmu-miR-151-5p,v11	373	344	251	334	221.5	339	227	27
Analyte 577	hsa-miR-521,v11	19	18	15	19	15	20	21	21
Analyte 578	hsa-miR-483-5p,v11	12	11	10	9	7	9	14	20
Analyte 579	hsa-miR-362-5p,v11	12	14	12	14	11	12	14.5	21
Analyte 580	old_j-mir-16	13	12	13	11	12	14	14	22
Analyte 581	hsa-miR-517a,hairpin-hsa-mir-517b,v11	11	12	10	10	11	12	13	21
Analyte 582	hsa-miR-516b,v11	10	11	8	9	9	10	14	20
Analyte 583	hsa-miR-518b,v11	11	10	9	9	11	10	14.5	19
Analyte 584	hairpin-hsa-mir-519d,v11	10	11	8	10	11	12	11	18
Analyte 585	hairpin-hsa-mir-140,hairpin-mmu-mir-140,v11	15	12	14.5	15	13	12	14	24
Analyte 586	hsa-miR-28-3p,v11	17	20	17	12	17	17	16	29.5
Analyte 587	old_j-mir-47	14	13	14	16	16	14	16	26
Analyte 588	hairpin-hsa-mir-519a,v11	17	11.5	17	14	14	17	16.5	29
Analyte 589	hairpin-hsa-mir-26b,hairpin-mmu-mir-26b,v11	303	269.5	275	278.5	191.5	314	169	25
Analyte 590	hsa-miR-519c-5p,hsa-miR-519b-5p,hairpin-hsa-mir-522,v11	17	15	15	15	16	15	16	26
Analyte 591	hairpin-hsa-mir-527,v11	12	14	14	14	15	16	18	26
Analyte 592	hsa-miR-487a,v11	14	15	13	14	13	15	15	22
Analyte 593	hsa-miR-493,v11	22	18	20	16.5	16	19	17	21
Analyte 594	hsa-miR-523,v11	13	14	16	13	14	14	16	23
Analyte 595	hsa-miR-518a-5p,hsa-miR-527,v11	3	6	6.5	7	5	9.5	10	13
Analyte 596	hsa-mmu-miR-532-5p,v11	31	14	9	7	6	6	18	9
Analyte 597	hsa-miR-455-5p,hairpin-mmu-mir-455,v11	5	4	4	5.5	9	5	8	13
Analyte 598	hsa-mmu-miR-539,v11	6	5	4	4	5	4	9	14
Analyte 599	hsa-miR-544,v11	7	5	5	5	7	7	9	16
Analyte 600	hairpin-hsa-mir-545,v11	9.5	6	3.5	6	6	9	10.5	18
Analyte 601	hsa-mmu-miR-487b,v11	11	9	10	8	7	6	10	16
Analyte 602	hsa-miR-551a,v11	10	7	7.5	7	7	8	8	12
Analyte 603	hsa-miR-552,v11	11.5	5	4.5	9	8	6.5	4	16
Analyte 604	hsa-miR-553,v11	4	7	10	10	6.5	11	8	19
Analyte 605	hsa-miR-554,v11	15	17	13	11.5	16	16	20	19.5
Analyte 606	hsa-mmu-miR-92b,v11	73	41	38	55	32	16.5	20	21
Analyte 607	hsa-miR-555,v11	18	16.5	14	13.5	10	17.5	24	19.5
Analyte 608	hsa-miR-556-5p,v11	17	9.5	13	7	12	8	20.5	14
Analyte 609	hsa-miR-557,v11	20	17	15	17.5	18	15	15	27
Analyte 610	hsa-miR-558,v11	23.5	13.5	5	23.5	13	22	11	17
Analyte 611	hsa-miR-559,v11	0	0	7	7	13	31	28	25
Analyte 612	NotAvailable	6	4	5	5	2.5	4	3	15
Analyte 613	hsa-miR-561,v11	101	96	92	99	63	110.5	53	13
Analyte 614	hsa-miR-562,v11	7	7.5	7	5	2	0.5	5	13
Analyte 615	hsa-miR-563,v11	5	7	6	4	5	6	9	14
Analyte 616	hsa-miR-564,v11	6	5	6	8	6	8	5	16.5
Analyte 617	NotAvailable	10	9	4.5	5	4	7	9.5	20
Analyte 618	hsa-miR-566,v11	6	7	3	5	5	7.5	8	13
Analyte 619	hsa-miR-567,v11	5	6	3	4.5	5	8	3	17
Analyte 620	ebv-miR-BHRF1-1,v11	5	8	6	6	5	8	3	16
Analyte 621	hsa-mmu-miR-568,v11	8	5	4	6	5	7	10	11
Analyte 622	hsa-miR-569,v11	9	7	4	4	4	6	8.5	15
Analyte 623	hairpin-hsa-mir-570,v11	6	6	8.5	8	8	8	6	16
Analyte 624	hsa-miR-571,v11	7	10	9.5	7	7	6	11	15
Analyte 625	hsa-miR-572,v11	6	8	4	7	7	6	7	13
Analyte 626	hsa-miR-573,v11	5	3	6	9	6	7	8	13
Analyte 627	hsa-mmu-miR-574-3p,v11	9	8	10	7.5	7	4	9.5	13
Analyte 628	hsa-miR-575,v11	11	8	9.5	10	10	15	15	17
Analyte 629	hsa-miR-576-5p,v11	228	218.5	208	218	144	243	116	22
Analyte 630	hsa-miR-577,v11	9	13	12	7	9	11.5	15	17.5
Analyte 631	hsa-miR-578,v11	15	19	19	17	13	11	16	25
Analyte 632	hairpin-hsa-mir-579,v11	16	22	18	15	19	20	23.5	19
Analyte 633	hsa-miR-580,v11	20	18	23	21	22	19	23.5	35
Analyte 634	hsa-miR-581,v11	5.5	4	6	6	6	6	10	10
Analyte 635	hsa-mmu-miR-582-5p,v11	50	49	53	51.5	39	52	40	11
Analyte 636	hsa-miR-583,v11	8	3	2.5	4	5	8	6	13.5
Analyte 637	hsa-miR-584,v11	3	6	7	4.5	5	7	9	11
Analyte 638	hsa-miR-585,v11	7	3	5	5	5	6.5	8	13.5
Analyte 639	hsa-miR-548a-3p,v11	7	5	7	6	5	7	7	12
Analyte 640	hsa-miR-586,v11	6	7	4	4	7.5	5	14	14
Analyte 641	hsa-miR-587,v11	9	4	4	5	8	4	8	14
Analyte 642	hsa-miR-548b-3p,v11	9	7	6	6	6	8	11	17
Analyte 643	hsa-miR-588,v11	10	11	6	10	7	9	10	18
Analyte 644	hairpin-hsa-mir-589,v11	12	8	7	5	10	9	15	14.5
Analyte 645	hairpin-hsa-mir-550,v11	6	10	9	10	5	8	8	18
Analyte 646	hsa-miR-591,v11	11	13	12	9.5	10	8.5	12	20
Analyte 647	hsa-mmu-miR-592,v11	14	9	13	10.5	10	11.5	17	21
Analyte 648	hairpin-hsa-mir-593,v11	11	13	12	10	11	12	15	18
Analyte 649	NotAvailable	9	11	9	10	11	8	11	21
Analyte 650	hsa-miR-595,v11	12	15.5	13	16	14	13	15	17
Analyte 651	hsa-miR-596,v11	15	17	14	14	17	16	15	27
Analyte 652	hsa-miR-597,v11	23	25	22	25	23	22	27.5	32
Analyte 653	hsa-miR-598,v11	14	6	11	10	10	12	10	13
Analyte 654	hsa-miR-599,v11	6	7	8	5	7	6	11.5	16.5
Analyte 655	hsa-miR-600,v11	6	10	6	7	7	7	8	18
Analyte 656	hsa-miR-601,v11	8	8	10	6	4	9	8	14
Analyte 657	hsa-miR-602,v11	8	7	7	10	8	6	11	17
Analyte 658	hsa-miR-603,v11	12	13	10	8.5	9	10	12	20
Analyte 659	hsa-miR-604,v11	9	10	9	10	10	11	12	18
Analyte 660	hsa-miR-605,v11	8	7	7	6	9	6	9	16
Analyte 661	hsa-miR-606,v11	8	10	8	7	7	10	9.5	15
Analyte 662	hsa-miR-607,v11	28	24	23	22	18	27	15	19
Analyte 663	hsa-miR-608,v11	8	12	11	10	12	10	15	18
Analyte 664	hsa-miR-609,v11	12	11	8.5	6	9	9.5	12	18
Analyte 665	hsa-miR-610,v11	14	13	10	11	8	9	14	20
Analyte 666	hsa-miR-611,v11	11	9	12	9.5	12	9	13	21
Analyte 667	hsa-miR-612,v11	14	14	13	13	14	17	14	28
Analyte 668	hsa-miR-613,v11	9	12	11	10	10	10	16	20
Analyte 669	hsa-miR-614,v11	31	28	28	29	37	23.5	41	49
Analyte 670	hsa-mmu-miR-615-3p,v11	14.5	15	13	12	12	12.5	16	20
Analyte 671	hairpin-hsa-mir-616,v11	18	16	13	12	12	12	14	26
Analyte 672	hsa-miR-548c-3p,v11	14	13	13	12	12	11	14	20
Analyte 673	hsa-miR-617,v11	10.5	12	12	11	13	13	12	25
Analyte 674	hsa-miR-619,v11	15	12	13	11	12.5	13	16	20
Analyte 675	hsa-miR-620,v11	13.5	15	12	15	11	14	10	22
Analyte 676	hsa-miR-621,v11	12	12	16	12	12	11	13	18
Analyte 677	hsa-miR-622,v11	16	14	14	13.5	14	16	14.5	22
Analyte 678	hsa-miR-623,v11	17	14	16	14	14	13	18	20
Analyte 679	hairpin-hsa-mir-624,v11	19	18	17	18	17	16	19	25
Analyte 680	hsa-miR-625,v11	4196	4144.5	4088	4215	3712	4066	3889	23
Analyte 681	hsa-miR-626,v11	17	17	16	17	15	16	15	27
Analyte 682	hsa-miR-627,v11	21	20.5	20	19	18	20	21	24
Analyte 683	hsa-miR-628-3p,v11	61	62	67	63	48	63	51	28
Analyte 684	hairpin-hsa-mir-629,v11	19	20	19	20	21	24	18	26
Analyte 685	hsa-miR-630,v11	16	18	14	14	17	14.5	17	24
Analyte 686	hsa-miR-631,v11	18	15.5	18	16	19	17.5	19	23
Analyte 687	hsa-miR-632,v11	27	21	20	27	20	23.5	24	23
Analyte 688	hsa-miR-633,v11	22	22	18	22	20	21	17	28
Analyte 689	hsa-miR-634,v11	16	16.5	15	16	17	18	18	24
Analyte 690	hsa-miR-635,v11	43	37	38	39	44.5	37	36	82
Analyte 691	hairpin-hsa-mir-636,v11	25	22	22	21	21	20	24	31
Analyte 692	hsa-miR-637,v11	8	5	4	4	4	4	6	14
Analyte 693	hsa-miR-638,v11	10	4	3	4	4	7	9	14
Analyte 694	hsa-miR-639,v11	4.5	5	3	8	5.5	3	7	12
Analyte 695	hsa-miR-640,v11	6	4	2	6	4	5	9	18
Analyte 696	hsa-miR-641,v11	5	4	4	5	7.5	8	7.5	12
Analyte 697	hsa-miR-642,v11	3	6	6	6	4	7	10	12
Analyte 698	hsa-miR-643,v11	6	6	7	4	6	7	5	16
Analyte 699	hsa-miR-644,v11	8	8	7	7	5.5	6	10.5	15
Analyte 700	hsa-miR-645,v11	9	3	4	6	4	7	7	14
Analyte 701	hsa-miR-646,v11	3	8	5	5	6	6	9	13
Analyte 702	hsa-miR-647,v11	11	8	8	7	6	7	4	17
Analyte 703	hsa-miR-648,v11	7	8.5	3.5	8	5	5	8	15
Analyte 704	hsa-miR-649,v11	206	198.5	225	196	162.5	191	158.5	16
Analyte 705	hsa-miR-650,v11	9.5	11	7	9	9	7.5	13	22
Analyte 706	hsa-miR-651,v11	7	8.5	6	7	8	9	7.5	17
Analyte 707	hairpin-hsa-mir-652,hairpin-mmu-mir-652,v11	16	15	17	11	11.5	14	16	18
Analyte 708	hsa-miR-548d-3p,v11	9	8	8	10	9	9.5	15	16
Analyte 709	hsa-miR-661,v11	6	12	12	8	9	9	5.5	17
Analyte 710	hsa-miR-662,v11	6	8	11	7	8	10.5	16	14
Analyte 711	hsa-miR-663,v11	8	9	9	8	8	10	8	15
Analyte 712	hsa-miR-449b,v11	13.5	12	9	9	13	13	14	21
Analyte 713	hairpin-hsa-mir-653,hairpin-mmu-mir-653,v11	12	10	11	9	11	9.5	15.5	16
Analyte 714	hsa-mmu-miR-411,v11	10	14	10	12	11	6	15	19
Analyte 715	hsa-miR-654-5p,v11	12	4	11	9.5	9	14	14	19
Analyte 716	hsa-miR-655,v11	11	8	12	11	9	11	15	21
Analyte 717	hsa-miR-656,v11	82	69	68.5	74	49	85	42	22
Analyte 718	hsa-miR-549,v11	15	13	12.5	9	14	14	16.5	17.5
Analyte 719	hsa-miR-657,v11	24.5	31	30	27	22	28.5	29	18
Analyte 720	hsa-miR-658,v11	14.5	12	9.5	11.5	11	13	16	21
Analyte 721	hsa-miR-659,v11	48	48	47	43	32	42	37	21
Analyte 722	hsa-miR-660,v11	14	15	12	13	14	15	16	23
Analyte 723	hsa-mmu-miR-421,v11	14	17	12	16	17	13	13	16.5
Analyte 724	hsa-miR-542-5p,hairpin-mmu-mir-542,v11	12	16.5	12	11	14.5	15	18	19
Analyte 725	hsa-mmu-miR-542-3p,v11	14.5	15	15	13	15	15	17	22
Analyte 726	hsa-mmu-miR-758,v11	18	20	17	13	14.5	18	19	26
Analyte 727	hsa-mmu-miR-668,v11	14	16	11	15	14	14	16	25
Analyte 728	hsa-miR-767-5p,v11	16	15.5	15	15	14	17	17	21
Analyte 729	hsa-miR-767-3p,v11	18	15	14	17	16	19	20	21
Analyte 730	hairpin-hsa-mir-454,v11	20	16	17	15	17	16	22	22
Analyte 731	hairpin-hsa-mir-454,v11	20	24	24	23	22	19	21	28.5
Analyte 732	hsa-miR-769-5p,v11	17	18.5	18.5	15	16	16	20	23
Analyte 733	hsa-miR-769-3p,v11	15	15	14	13	15	13	15.5	21
Analyte 734	hsa-miR-766,v11	23	20	18	21	20	23	23	27
Analyte 735	hsa-miR-802,hairpin-mmu-mir-802,v11	18	20	19	21	19	24	24	25
Analyte 736	hsa-miR-765,v11	16	18	16	16	16	15	19	24
Analyte 737	hsa-mmu-miR-874,v11	19	19	19.5	19	19	20	20	26
Analyte 738	hairpin-hsa-mir-29b,hairpin-mmu-mir-29b,v11	23	22.5	21	21	23	21	21	34.5
Analyte 739	hairpin-hsa-let-7g,hairpin-mmu-let-7g,v11	9	7	6	8	5	9	9	17.5
Analyte 740	hsa-miR-518a-3p,v11	4	5.5	6	6	5	2	7	11
Analyte 741	hsa-miR-523,v11	7	10	6	6	7	4.5	4	14
Analyte 742	old_j-mir-6	13	12	15	12	12	14	13.5	15
Analyte 743	hsa-mmu-miR-590-5p,v11	8	2	1	4	7	9	4	13.5
Analyte 744	hsa-miR-515-3p,v11	8	8	7	8	5	7	7	15
Analyte 745	hairpin-hsa-mir-146b,v11	7	13	10	8	10	9	11	18
Analyte 746	old_j-mir-10	8	9	7	8	10	8	10	20
Analyte 747	hsa-mmu-miR-551b,v11	7	9	7.5	8	7	8	10	19
Analyte 748	old_j-mir-46	9	9	11	9	11	10	7	21
Analyte 749	hairpin-hsa-mir-222,hairpin-mmu-mir-222,v11	10	10	9	9	11	9	10	19
Analyte 750	old_j-mir-4	11.5	10	10	10	12	12	16.5	16
Analyte 751	hsa-mmu-miR-877,v11	14	11	10	12	10	10	14	17.5
Analyte 752	hsa-miR-33b,v11	16	12	13	12	12	14	15	21
Analyte 753	hairpin-hsa-mir-24,v11	16	11	12	12	13	12	13	20
Analyte 754	hairpin-hsa-mir-487a,v11	10	11	10	11	11	11	11	20
Analyte 755	hairpin-hsa-mir-503,v11	48	49.5	48	49.5	38	45	46	26
Analyte 756	hsa-miR-1323,v11	14	19	16	16	16	12	13	23
Analyte 757	hairpin-hsa-mir-505,v11	15	16	15	15	16	15	20	26
Analyte 758	hsa-miR-483-3p,v11	23	20	18	21	21	20	23	27
Analyte 759	hsa-mmu-miR-484,v11	24	15	16	18	14	14	13	21
Analyte 760	hsa-miR-486-5p,mmu-miR-486,v11	34	23	17	26	19	16	14	21
Analyte 761	hairpin-hsa-mir-18a,hairpin-mmu-mir-18a,v11	25	28	28	29	31	26	33.5	45
Analyte 762	hsa-mmu-miR-363,v11	3	6	5	4	4	6	11	12
Analyte 763	hairpin-hsa-mir-19b,hairpin-mmu-mir-19b,v11	5	7	6	6	6	7	8	17
Analyte 764	hairpin-hsa-mir-1307,v11	6	5	9	7	8	9	11	15
Analyte 765	hairpin-hsa-mir-520c,v11	7	11	8	11	8	10	9	19
Analyte 766	hairpin-hsa-mir-23a,hairpin-mmu-mir-23a,v11	10	12	10	7	11	9	12.5	13.5
Analyte 767	hsa-miR-1185,v11	11.5	8	10.5	9	10	11	12	18
Analyte 768	hsa-mmu-miR-369-5p,v11	11	14	11	9	10	11	14.5	19
Analyte 769	hsa-miR-339-3p,v11	13	14	14	14	14	13	16	25
Analyte 770	hairpin-hsa-mir-671,hairpin-mmu-mir-671,v11	14	11	13.5	11	12	11	15	20
Analyte 771	hsa-mmu-miR-342-5p,v11	15	13	11	13	12	12	16	21
Analyte 772	hairpin-hsa-mir-19a,hairpin-mmu-mir-19a,v11	14	12	12	13	11	12	15	22
Analyte 773	hairpin-hsa-mir-1307,v11	15	17	12	14	16	15	17	26
Analyte 774	hsa-mmu-miR-423-5p,v11	58	30.5	39	56	31	27	29	26
Analyte 775	hsa-miR-542-5p,hairpin-mmu-mir-542,v11	6	7	10	6	8.5	10	13	15
Analyte 776	hsa-miR-1283,v11	9	8	8	8	9	10	11	18.5
Analyte 777	hsa-miR-942,v11	9	10	7	8	9	12	16	23
Analyte 778	hsa-miR-432,v11	8	8	10	11	10	11	10	18
Analyte 779	hsa-mmu-miR-425,v11	74.5	26	27.5	40	27	16	15.5	23
Analyte 780	hairpin-hsa-mir-92a,v11	12	15	12	16	13.5	14	14	23
Analyte 781	hsa-miR-193a-5p,v11	11	14	13	11	11	11	12	22
Analyte 782	hsa-miR-515-5p,v11	15	15	16	14	17	15	18	25
Analyte 783	hsa-miR-516a-5p,v11	9	7	7	7	8	8	8	19.5
Analyte 784	hairpin-hsa-mir-30d,hairpin-mmu-mir-30d,v11	20	16	17	19	14	13	17	18
Analyte 785	precontrol5	15	17	14	17	15.5	14	17	26
Analyte 786	precontrol4	16	16	16.5	18	19	16	20	26
Analyte 787	precontrol3	32	28	28	32.5	26	30	34.5	28
Analyte 788	postcontrol-PTG20210	6167	6162	6147	6144	6439	6015	6256.5	6905
Analyte 789	hsa-miR-768-5p,v11	24	19	21	21	19	22	25	27
Analyte 790	postcontrol-MRC677	8689	8994	8864	8863	9350.5	8594	9084.5	10114
Analyte 791	postcontrol-FVR506	7792	7643.5	7686	7858	8058	7350	7750	9369.5
