# Supplementary material for: Capture, amplification, and global profiling of microRNAs from low quantities of whole cell lysate
Source: Royal Society of Chemistry journal article supplement (doi:10.1039/c7an00670e), 2017-01-01
Supplement: c7an00670e2.xlsx [file c7an00670e2.xlsx]

## Sheet: Sheet1
Analyst #	miRNA	100,000 BaF3 cells	100,000 BaF3 cells	100,000 NIH3T3 cells	100,000 NIH3T3 cells	100,000 BaF3 KO cells	100,000 BaF3 KO cells	Water	Luminex beads bacground
Analyte 1	hsa-mmu-miR-125a-5p,v11	56	66	139	168.5	68	51	49	65
Analyte 2	hsa-mmu-miR-10b,v11	15	23	118	166	20	14	13	22.5
Analyte 3	hsa-mmu-miR-107,v11	999	2897.5	212	331	2109	713	20.5	25
Analyte 4	hsa-mmu-miR-103,v11	1163	3032	228	365	2375	868.5	21	22
Analyte 5	hsa-mmu-let-7f,v11	3923.5	5886	785	1243.5	5203	3840	187	23
Analyte 6	hsa-mmu-let-7d,v11	2257.5	4495	243	359	3563	2000	51	28
Analyte 7	mmu-miR-101b,v11	278.5	335	36	43	325	173	18	27
Analyte 8	hsa-miR-320a,mmu-miR-320,v11	344	986	33	41	671	227.5	10	23
Analyte 9	hsa-mmu-let-7e,v11	22	29	78	119	28	21	15	20
Analyte 10	hsa-miR-28-5p,mmu-miR-28,v11	381	685	323	393	623	359	115	29.5
Analyte 11	hsa-mmu-miR-26b,v11	549	1091	79.5	130	690.5	334	20	21
Analyte 12	hsa-mmu-miR-136,v11	17	20	11	13.5	19.5	10	11.5	23
Analyte 13	mmu-miR-211,v11	29.5	39	28	42	37	25.5	20.5	37
Analyte 14	hairpin-mmu-mir-199b,v11	16.5	24	45.5	66	24	11	11	29
Analyte 15	mmu-miR-217,v11	14	18	19	21	22	10	8	22.5
Analyte 16	hairpin-hsa-mir-30a,hairpin-mmu-mir-30a,v11	17	37	39	51	22.5	13	9	21
Analyte 17	hsa-mmu-miR-29c,v11	286	795.5	179	224	362	102.5	14	22
Analyte 18	hsa-mmu-miR-98,v11	1320	2787	112	180	1943.5	1071.5	47	24
Analyte 19	hsa-mmu-miR-1,v11	14	19	13	21	15.5	9	5	17
Analyte 20	hsa-mmu-miR-30b,v11	132	418	34	57	276	82	11	27
Analyte 21	hsa-mmu-miR-130a,v11	18	19	329	455	23	15	10	19
Analyte 22	hsa-mmu-miR-142-3p,v11	1617	3000.5	22	23	31.5	13	19	29
Analyte 23	hsa-mmu-miR-137,v11	14	22	19	21	19	11	10	23
Analyte 24	mmu-miR-201,v11	11	25	17	27.5	29.5	9	10	25
Analyte 25	mmu-miR-202-3p,v11	43	59	48	54	51	51	46	60
Analyte 26	hsa-mmu-miR-206,v11	14	21	48	56.5	20	12	10.5	22
Analyte 27	mmu-miR-207,v11	9	29	20.5	32	25	18	16	30
Analyte 28	hsa-mmu-miR-208a,v11	10	24	18.5	24.5	23	15	13	25
Analyte 29	hsa-mmu-miR-212,v11	270	210	228.5	233	217	229	191.5	29
Analyte 30	hsa-mmu-miR-216a,v11	15	23.5	17	22	21	12	9	27
Analyte 31	hsa-mmu-miR-218,v11	19.5	25	114	191	20	11	11	28
Analyte 32	hsa-mmu-miR-34a,v11	26	62	393.5	617	31	18.5	12.5	19
Analyte 33	hsa-miR-211,v11	18	28	19	26	38	14.5	12	28
Analyte 34	hsa-miR-215,v11	10.5	19	14.5	20	18	11.5	12	21
Analyte 35	hsa-miR-217,v11	12	19	14	20	19	12	8	25
Analyte 36	hsa-mmu-miR-17,v11	1791	4341	87	149	3527.5	1559	57	23
Analyte 37	hsa-mmu-miR-18a,v11	953	1884	67	106	1949	832	37	34.5
Analyte 38	hsa-mmu-miR-181a,v11	3212	5434.5	292	469	4240	2450	85	33.5
Analyte 39	hsa-mmu-miR-181b,v11	3528	6645	162.5	233	4879	2657	100	31
Analyte 40	hsa-mmu-miR-199a-5p,v11	222	213	255	312	221	178	165.5	35
Analyte 41	hsa-miR-199b-5p,v11	13	24	20.5	26.5	28	15	14	25
Analyte 42	hsa-mmu-miR-19a,v11	1621	3662	146.5	223.5	3338	1166	28	19
Analyte 43	hsa-mmu-miR-203,v11	14	19	23	24	20	17	9.5	26
Analyte 44	hsa-mmu-miR-204,v11	16	25	19	26	21	15	12	26
Analyte 45	hsa-mmu-miR-205,v11	18	33	21	26	16	14	9	32
Analyte 46	hsa-mmu-miR-210,v11	8	24	32	55.5	23	12	15	23
Analyte 47	hsa-mmu-miR-214,v11	23	22	61	76	22.5	14	9	23
Analyte 48	hsa-mmu-miR-100,v11	19.5	29	35	50	23	17	19	34
Analyte 49	hsa-miR-106a,v11	979	2955	75	119	2281	797	45	45
Analyte 50	hsa-mmu-miR-10a,v11	16.5	26	22.5	28	25	17	11	22.5
Analyte 51	hsa-mmu-miR-122,v11	15	22	16	18	23	12	12	24
Analyte 52	mmu-miR-126-5p,hairpin-hsa-mir-126,v11	44	101	17	24	48.5	21	11	29
Analyte 53	hsa-mmu-miR-130b,v11	462	1166	34.5	50	869	196.5	15	24
Analyte 54	old_hmr-miR-134_rfam7.0	20	22.5	24	24	26	13	10	25
Analyte 55	hsa-mmu-miR-142-5p,v11	312	745	18	27	17	13.5	12.5	24
Analyte 56	mmu-miR-155,v11	356.5	999	116.5	190	688	263	13	23
Analyte 57	hsa-mmu-miR-15b,v11	159	576	36	49	331.5	95	16	20
Analyte 58	hsa-mmu-miR-181c,v11	123	228	142.5	218	142	64	10	26
Analyte 59	hsa-mmu-miR-15a,v11	148	489	98.5	125	334	84	16	36
Analyte 60	hsa-miR-768-3p,v11	21	21.5	22	21	22	15.5	17	25.5
Analyte 61	hsa-mmu-let-7g,v11	3164	5405.5	558	901	4170.5	2500	88	25
Analyte 62	hsa-mmu-miR-92a,v11	3034	4076	505	582	4002	3047	129	49
Analyte 63	hsa-mmu-miR-146a,v11	580	1423	23	27	678.5	208	16	28
Analyte 64	hsa-mmu-let-7c,v11	5241.5	7129.5	960	1135	7227	4935	180	27
Analyte 65	hsa-miR-7,mmu-miR-7a,v11	2628	6407	1171.5	1911	5391	2807	71	25
Analyte 66	hairpin-hsa-mir-9,hairpin-mmu-mir-9,v11	210	724	102.5	181	544	190	16	30
Analyte 67	hsa-mmu-let-7i,v11	5500	7574.5	1665	2364	6802.5	4353	125	24
Analyte 68	hsa-mmu-let-7a,v11	3677	5468	717	892	4880	3615	153	28
Analyte 69	hsa-mmu-let-7b,v11	4448	7504	891	1116.5	6831	4194	127	35
Analyte 70	hsa-mmu-miR-132,v11	164	130.5	133	125	127.5	135	108	30
Analyte 71	hsa-mmu-miR-324-5p,v11	48	95.5	28	45.5	97	41.5	10.5	38
Analyte 72	hsa-mmu-miR-124,v11	26	43	24	32	48.5	20	13.5	32
Analyte 73	hsa-miR-125b,mmu-miR-125b-5p,v11	20	22	58.5	80	24	13	12	23
Analyte 74	hsa-mmu-miR-99a,v11	22	31	26	31.5	33	19	22	32
Analyte 75	hsa-mmu-miR-16,v11	2304	4510	865	1194	3520	1788	57	30
Analyte 76	hsa-mmu-miR-29b,v11	432	1531	719	851	749	134	16	31
Analyte 77	hsa-miR-101,mmu-miR-101a,v11	95	158	22	31	131	52	16	27
Analyte 78	hsa-miR-105,v11	15	28	17	29	22	15	11.5	27
Analyte 79	hsa-mmu-miR-106b,v11	307	845.5	66	105	578	168	24	34
Analyte 80	hsa-miR-126,mmu-miR-126-3p,v11	44	114.5	18	30	70	24	17	52
Analyte 81	hsa-miR-127-3p,mmu-miR-127,v11	19	29.5	20.5	27	23	18	15	33
Analyte 82	hairpin-hsa-mir-24,hairpin-mmu-mir-24,v11	36	9.5	30	28	22	29	3	36
Analyte 83	hsa-mmu-miR-200c,v11	18.5	30	21	24	30	19	15	24
Analyte 84	hsa-miR-224,v11	22	23	18	25	24	16	14	31
Analyte 85	hsa-mmu-miR-25,v11	1505	3422	305	461.5	2258.5	885.5	38	26
Analyte 86	hsa-mmu-miR-27a,v11	644	1909.5	259	301	933	302.5	45.5	25
Analyte 87	hsa-mmu-miR-296-5p,v11	13	24	20	26	22	18	14.5	25
Analyte 88	hsa-miR-299-5p,hairpin-mmu-mir-299,v11	58	43	41.5	40.5	46.5	43	34	31
Analyte 89	hsa-mmu-miR-301a,v11	818.5	2361	134	214	1415.5	360.5	23	23
Analyte 90	hsa-mmu-miR-302a,v11	16	25	22	28	21	14	15	30
Analyte 91	hsa-mmu-miR-30a,v11	126	295	669	983	206	78	23.5	30
Analyte 92	hsa-mmu-miR-30e,v11	183	452	68.5	76	308	99	23	35.5
Analyte 93	hsa-mmu-miR-31,v11	21	42	893	1316	34	24	23	31
Analyte 94	hsa-mmu-miR-32,v11	142.5	344	43	51	209	71	18	33
Analyte 95	hairpin-hsa-mir-34b,v11	35	63	50.5	56	61	29	25	39
Analyte 96	hsa-miR-34c-5p,mmu-miR-34c,v11	433.5	1044	1255.5	1545	1144.5	508	30	31
Analyte 97	hsa-mmu-miR-93,v11	2066	4564	316	593	2802	1175	53	31
Analyte 98	hsa-miR-95,v11	19	28	24	28	29	21	20	30.5
Analyte 99	hsa-mmu-miR-129-5p,v11	21	27	31	40	26	17	19	32
Analyte 100	hairpin-hsa-let-7d,hairpin-mmu-let-7d,v11	136	394	47	55	300	142	24	38
Analyte 103	mmu-miR-106a,v11	192	296.5	108.5	91	238.5	148	91	24
Analyte 104	hsa-mmu-miR-135b,v11	13	25.5	18	23.5	24	13	12.5	25
Analyte 108	mmu-miR-151-3p,v11	13	21.5	18	24	18	13	12	26.5
Analyte 109	hairpin-mmu-mir-17,v11	22	42	17	21	42	15	11	22
Analyte 112	mmu-miR-224,v11	11.5	20	13	26	19.5	13	13	24
Analyte 117	hairpin-mmu-mir-290,v11	18	23	17	17	29	9	21	24
Analyte 118	mmu-miR-291a-3p,v11	16.5	23	22	24	21.5	14	10	28.5
Analyte 119	mmu-miR-291a-5p,v11	12.5	23	19	30	22	14	15.5	25
Analyte 120	mmu-miR-292-3p,v11	24	28	19	25.5	27	18.5	10	25
Analyte 124	mmu-miR-292-5p,v11	11	21	21	17	25	13.5	12	24
Analyte 128	mmu-miR-293,v11	289	195	213	189.5	191	254	201.5	30
Analyte 134	mmu-miR-294,v11	13	27	18	16	27	19	15	29
Analyte 135	mmu-miR-295,v11	19	23.5	18	31.5	37	19	16.5	36.5
Analyte 137	hsa-miR-297,mmu-miR-297a,v11	211	575.5	12	30	548	121	8	24.5
Analyte 141	mmu-miR-298,v11	31	56	27	33	41	26	20	31.5
Analyte 142	mmu-miR-300,v11	21	34.5	32.5	35.5	39.5	18.5	24.5	35
Analyte 150	hsa-mmu-miR-323-3p,v11	20	34	39	32	10	33	18	58
Analyte 156	hsa-miR-324-3p,hairpin-mmu-mir-324,v11	13	30.5	17	19.5	33	13	10	24
Analyte 158	hairpin-mmu-mir-325,v11	12.5	21	12	22	18	11	9.5	24
Analyte 160	hsa-mmu-miR-326,v11	23	38	20	16	39.5	15	10	28
Analyte 161	hsa-mmu-miR-328,v11	77	294	24	42	210	81	15	24
Analyte 162	mmu-miR-329,v11	17	26	18	29	14	15	13	21.5
Analyte 163	hsa-mmu-miR-331-3p,v11	23	27	15	23	24	13	5	26
Analyte 164	mmu-miR-337-3p,v11	11	22	17	25	21	14	11	21.5
Analyte 165	hsa-mmu-miR-338-3p,v11	16	21.5	14.5	21	28.5	13	9	13.5
Analyte 166	ebv-miR-BART1-5p,v11	18	23	15	27	21	12	10	24
Analyte 168	hsa-mmu-miR-339-5p,v11	22	39	18	24	32	16	9	21
Analyte 170	mmu-miR-340-3p,hairpin-hsa-mir-340,v11	39	125	19	22	47	20	11	22
Analyte 171	hairpin-mmu-mir-341,v11	9.5	21	16	21	17	13	11	25
Analyte 172	hsa-mmu-miR-342-3p,v11	15.5	25	33	35	23	20	16.5	24
Analyte 173	mmu-miR-344,v11	21	25	17	30	26	11	15	22
Analyte 174	hairpin-mmu-mir-345,v11	34	65	23	35.5	54	21.5	18	22
Analyte 175	mmu-miR-346,v11	13	27	19	32.5	19	15	11	26
Analyte 186	hairpin-mmu-mir-34b,v11	225.5	726	536	718	605	164.5	20	27
Analyte 188	mmu-miR-350,v11	40.5	120	34	36	68	33	15	44
Analyte 189	mmu-miR-351,v11	49	144	34	41	227.5	83	17.5	24
Analyte 202	mmu-miR-7b,v11	37	83	24	39	74.5	32.5	12	41
Analyte 207	old_r-miR-20*_rfam7.0	18	37.5	28	33	34	26	25	33
Analyte 213	old_r-miR-327_rfam7.0	21	33	28	39	36	27	27	38.5
Analyte 215	old_r-miR-333_rfam7.0	25	48	16	20	33.5	18.5	15	22.5
Analyte 216	hsa-miR-335,mmu-miR-335-5p,v11	10.5	22	16	17	23	11	9	25
Analyte 220	hairpin-hsa-mir-7,hairpin-mmu-mir-7a,v11	25.5	68	19	28	44	26	18	25
Analyte 221	hsa-mmu-miR-200a,v11	9	25	10	22	19	9	5	23
Analyte 222	hsa-mmu-miR-194,v11	10	27	14	17	24	12	5	18.5
Analyte 223	old_hmr-miR-191_rfam7.0	41	115	23	21	66	23	12	25
Analyte 224	hsa-mmu-miR-190,v11	167.5	409	68	108	279	93	11	23.5
Analyte 226	hsa-mmu-miR-186,v11	173	621	71	93	472	123	12	22.5
Analyte 229	hairpin-hsa-mir-185,hairpin-mmu-mir-185,v11	38	103	22	29	52.5	23.5	11	23
Analyte 230	hsa-mmu-miR-184,v11	13	20	18	15.5	23	11	6	18.5
Analyte 237	hsa-mmu-miR-133b,v11	14	28	16	19	20.5	13	10.5	31
Analyte 239	hsa-miR-151-3p,v11	15	20	18	23	23	15	15	23
Analyte 240	hsa-mmu-miR-196b,v11	13	22	18	27	30	19	17	29.5
Analyte 246	hsa-mmu-miR-370,v11	15	27.5	21	25	22	17	19	28.5
Analyte 247	hsa-miR-371-3p,v11	15	27	20	30	28.5	16	18	29
Analyte 248	hsa-miR-372,v11	15	25.5	22	21	22	15	18	34
Analyte 253	hsa-miR-373,v11	25	29	22	28	28	17	22	28
Analyte 256	hairpin-hsa-mir-373,v11	21	31	22	32.5	22	23	19	33
Analyte 264	hsa-miR-374a,v11	24.5	35	30	32.5	33	26	26	37
Analyte 276	mmu-miR-215,v11	12	23	14	20.5	16	15	11	18.5
Analyte 286	hsa-mmu-miR-409-3p,v11	14	23.5	17	30	21	13.5	12.5	32
Analyte 287	hsa-mmu-miR-410,v11	17	24.5	15	22	21	14	17	27
Analyte 288	mmu-miR-376b,v11	16	27	16	21	30	15	13	26
Analyte 289	mmu-miR-376a,v11	12	22	15	18	23	12	9.5	24
Analyte 290	hairpin-hsa-mir-411,hairpin-mmu-mir-411,v11	18	28	20	24	27	18	15	34
Analyte 291	mmu-miR-380-3p,v11	12.5	26	20.5	22.5	22	13	13	25
Analyte 292	hsa-miR-412,hairpin-mmu-mir-412,v11	16	33	21	27.5	26.5	15	16	27
Analyte 293	hsa-mmu-miR-27b,v11	245	580.5	52	72	315	110	13	22
Analyte 294	hsa-mmu-miR-26a,v11	354	895	90	130	430	137	20	25.5
Analyte 295	hsa-mmu-miR-24,v11	1123.5	2395.5	476	733	1770.5	688	20	25
Analyte 296	hsa-mmu-miR-23b,v11	143	478	42.5	61	258	70	15.5	30
Analyte 297	hsa-mmu-miR-23a,v11	107.5	342	54	66	176	47	18	31
Analyte 298	hsa-miR-220a,v11	11	30	19	24	25.5	16	16	26.5
Analyte 299	hsa-mmu-miR-22,v11	180.5	431	320	438	359	98	19	40
Analyte 300	hairpin-hsa-mir-181a,hairpin-mmu-mir-181a,v11	369	1010	29	33	728	287	19	24.5
Analyte 301	hsa-mmu-miR-21,v11	5252	6126.5	1985	2493	5893.5	4931.5	602	32
Analyte 302	hsa-mmu-miR-20a,v11	2417	5478	172	263.5	4806	1957	44	22
Analyte 303	hsa-mmu-miR-19b,v11	2302	3664	370	500	3409	1737	40	29
Analyte 304	hsa-mmu-miR-196a,v11	16	26	28	32.5	32.5	17	14	30
Analyte 305	hsa-mmu-miR-148a,v11	18.5	30	24	30	23	19	18	25
Analyte 306	hsa-mmu-miR-145,v11	21.5	33	48	53	33	20.5	20	28
Analyte 307	hsa-mmu-miR-144,v11	21.5	31	23.5	35	25	18	19.5	26.5
Analyte 308	hsa-mmu-miR-143,v11	23	41	551	741	53.5	25	16	37
Analyte 309	hsa-mmu-miR-141,v11	25	32.5	22	29	31.5	17	17	26.5
Analyte 310	hsa-miR-140-5p,mmu-miR-140,v11	47	99	32	35	74	33	17	28
Analyte 311	hsa-mmu-miR-139-5p,v11	26.5	36	32	37	34	26	20.5	34.5
Analyte 312	hairpin-hsa-mir-138,hairpin-mmu-mir-138,v11	23	45	25	37	39	26	23	36
Analyte 313	hsa-mmu-miR-135a,v11	20	28	25	33.5	26	21	18	30
Analyte 314	hairpin-hsa-mir-133a,hairpin-mmu-mir-133a,v11	19	36	26	29	27	22	24	34
Analyte 315	hsa-mmu-miR-128,v11	59	139	31	38	103	53	24	40
Analyte 316	hsa-mmu-miR-128,v11	61	149.5	30	39	106	56	26	34
Analyte 317	hsa-miR-219-5p,mmu-miR-219,v11	48.5	132	23	33.5	86	35	20	36
Analyte 318	hsa-mmu-miR-221,v11	3181	4511	909	1521	3790	2118	86	40.5
Analyte 319	hsa-mmu-miR-222,v11	1602	3355	242.5	385.5	2504	1321	57	40
Analyte 320	hsa-mmu-miR-223,v11	78	277	34	39.5	107	48	24	42
Analyte 321	hsa-miR-33a,mmu-miR-33,v11	42	61	26	33	42	25	17.5	36
Analyte 323	hsa-mmu-miR-96,v11	68	85	107	104	102	73	61	108
Analyte 324	hsa-mmu-miR-9,v11	27	41	77.5	120	40	35	27.5	39
Analyte 325	hsa-mmu-miR-30d,v11	418	1244	152	230.5	957	314	10	22
Analyte 326	hairpin-hsa-mir-10b,hairpin-mmu-mir-10b,v11	16	28	120.5	178	24	12.5	10	23
Analyte 327	hsa-mmu-miR-188-5p,v11	27	72	14	21	54	18	13	22.5
Analyte 328	hsa-miR-193a-3p,mmu-miR-193,v11	22	24	36.5	37	25	14	8	26
Analyte 330	hsa-miR-198,v11	16	22.5	15	13.5	16.5	13	13	24
Analyte 331	hsa-mmu-miR-192,v11	27.5	40	17	24	32	17	12	24
Analyte 332	hsa-mmu-miR-187,v11	23	33	17.5	33	24	15	14	28
Analyte 333	hsa-mmu-miR-183,v11	55	36.5	35	29	36	46	44	19
Analyte 334	hsa-mmu-miR-182,v11	17	25	418	594	21	10	10	24
Analyte 335	hsa-mmu-miR-154,v11	12	26	19	26	22	16	11.5	25.5
Analyte 336	hsa-mmu-miR-153,v11	14.5	20	21	21	16	12	10	26
Analyte 338	hsa-mmu-miR-152,v11	18.5	21	54	84	25	12.5	14.5	24
Analyte 339	hsa-mmu-miR-150,v11	23	51	22	32	34	18	16	34
Analyte 340	hsa-mmu-miR-149,v11	29.5	43	34	57	45.5	21.5	15.5	37
Analyte 341	hsa-mmu-miR-148b,v11	672	1332	144	194	1353.5	739	20	22
Analyte 342	hsa-mmu-miR-30c,v11	579	1472	176	251	953	375	21.5	31
Analyte 343	hairpin-hsa-mir-29a,hairpin-mmu-mir-29a,v11	1139.5	1955	1564.5	1887.5	1510	587.5	41	36
Analyte 344	hsa-mmu-miR-200b,v11	23	36	19.5	28.5	26	13	14	24
Analyte 345	hairpin-hsa-mir-199b,hairpin-mmu-mir-199b,v11	24	32	175	310	28	15	15	29
Analyte 346	hsa-mmu-miR-197,v11	21.5	33	19.5	22	29	17	11.5	26
Analyte 347	hsa-mmu-miR-195,v11	17	31.5	30	36.5	33	20	16.5	30
Analyte 348	hsa-mmu-miR-99b,v11	26.5	29	91	99	24	23	21	33
Analyte 349	hsa-mmu-miR-433,v11	18	23	16	34	36	20	14	38
Analyte 350	hsa-mmu-miR-431,v11	25	31	18	27	20	17	18	32
Analyte 351	hsa-mmu-miR-365,v11	18	24	35	48.5	20.5	21	17	22
Analyte 352	hairpin-hsa-mir-450a,hairpin-mmu-mir-450a,v11	34.5	111	25.5	33.5	64	31.5	20	35
Analyte 353	hsa-mmu-miR-449a,v11	258.5	700	21	29	156	57	21	26
Analyte 354	hsa-mmu-miR-448,v11	25.5	41	25	38.5	37	22	18	41.5
Analyte 355	hsa-miR-424,v11	924	1892.5	106.5	172	1854.5	921	35	41
Analyte 356	hsa-miR-361-5p,mmu-miR-361,v11	94.5	112	64.5	79.5	99	98	60	30
Analyte 357	hsa-mmu-miR-375,v11	17	29	23.5	28	29	22	17	32
Analyte 358	hsa-mmu-miR-377,v11	20	36.5	27	29	35.5	24	19	34
Analyte 359	hairpin-hsa-mir-378,hairpin-mmu-mir-378,v11	52	127.5	28	33	95.5	43	14.5	36
Analyte 360	hsa-mmu-miR-379,v11	28.5	37	30	37.5	29	23	23	36
Analyte 361	hairpin-hsa-mir-380,hairpin-mmu-mir-380,v11	22.5	53	25	28	44	27	22	36
Analyte 362	hsa-mmu-miR-381,v11	24	39	26	30	32	20	19	33
Analyte 363	hsa-mmu-miR-382,v11	17	33	28.5	34	34	25	19	30.5
Analyte 364	hsa-miR-384,v11	33	61	36.5	42.5	56	32	25.5	45
Analyte 365	hairpin-hsa-mir-425,hairpin-mmu-mir-425,v11	65	166	27	38.5	105	39	23	36.5
Analyte 366	mmu-miR-452,hairpin-hsa-mir-452,v11	21.5	32	31	34	31	26	24	25
Analyte 367	hairpin-hsa-mir-30e,hairpin-mmu-mir-30e,v11	81	156.5	44	56	112	50	28.5	42
Analyte 368	hsa-mmu-miR-129-3p,v11	20.5	30.5	24	36	30	17	18	33
Analyte 369	mmu-miR-429,v11	26	49	26	35	40	26	26	35
Analyte 370	hairpin-mmu-mir-330,v11	28	40	28	31	31.5	27	25	32
Analyte 371	hairpin-mmu-mir-322,v11	31.5	61	26	34.5	58	28	19	29
Analyte 373	mmu-miR-383,v11	24	34	28	34	37	21	16	33
Analyte 374	old_r-miR-297_rfam7.0	43	60	32.5	40	48	33	25	41
Analyte 376	hairpin-hsa-mir-421,hairpin-mmu-mir-421,v11	13	25	16	23.5	22.5	14	10	22
Analyte 377	hairpin-mmu-mir-463,v11	18	20	10.5	19	14	10	12	21
Analyte 379	mmu-miR-464,v11	12.5	19	13	18	13.5	13	14	25
Analyte 381	mmu-miR-465a-5p,v11	14	22	18	21	19	13	13	25
Analyte 382	hairpin-mmu-mir-466a,v11	129	422	19.5	28	299	88	12	17
Analyte 384	hairpin-mmu-mir-467a,v11	56	153	17	27	138	44	14	26
Analyte 387	mmu-miR-468,v11	15.5	26	16	25	26	14	15	25
Analyte 388	mmu-miR-469,v11	19	24.5	18	24	22.5	16	17	25
Analyte 390	mmu-miR-470,v11	13.5	24	16	22	25	13.5	11	27
Analyte 391	mmu-miR-471,v11	25	36	26	27	26	22	18.5	24.5
Analyte 392	hairpin-mmu-mir-434,v11	29	35	24	27	31	22	14	26.5
Analyte 393	mmu-miR-434-3p,v11	24	32	21	31	17.5	20	12.5	32
Analyte 396	hairpin-hsa-mir-433,hairpin-mmu-mir-433,v11	18	38	21	25	40.5	21	15	32
Analyte 399	old_r-miR-336_rfam7.0	32	54.5	27	38	50	30	20	30
Analyte 401	old_r-miR-343_rfam7.0	21	32	22	28.5	28.5	18	18	27
Analyte 402	old_r-miR-344_rfam7.0	26	54	28	37	46	25	21	39.5
Analyte 404	old_r-miR-346_rfam7.0	41.5	87	35	41	73	39	23	40
Analyte 405	old_r-miR-347_rfam7.0	47	107	32	34	84	36	24	39
Analyte 407	old_r-miR-349_rfam7.0	26.5	35	27	34	34	20	19	33
Analyte 408	old_r-miR-352_rfam7.0	119	187	35	39	162.5	98	26	27
Analyte 409	hsa-mmu-miR-423-3p,v11	275	950	72	118	584	143	21	29.5
Analyte 412	hsa-miR-18b,v11	588	857.5	40	51	974	449	31	28
Analyte 413	hsa-mmu-miR-20b,v11	121.5	222	29	34	205	91.5	26	33.5
Analyte 415	hairpin-hsa-mir-191,v11	21	44	20	24	32.5	12	10	19
Analyte 417	hairpin-hsa-mir-154,hairpin-mmu-mir-154,v11	8.5	24	20	23	19.5	13	13	24
Analyte 419	hsa-miR-147,v11	11.5	23.5	16	26	20	15	12.5	25
Analyte 425	hsa-miR-155,v11	46	83	22	28	55	31	13	23.5
Analyte 426	hairpin-hsa-mir-17,v11	16	27	21.5	29	21	17	13.5	22
Analyte 428	hairpin-hsa-mir-200a,hairpin-mmu-mir-200a,v11	20	25	19.5	29	25	17	14	23
Analyte 430	hairpin-hsa-mir-302a,v11	23	26.5	21	29	27	17	17	29
Analyte 431	hsa-miR-299-3p,v11	20	29	21	35	22.5	19.5	19	22.5
Analyte 433	hairpin-hsa-mir-182,hairpin-mmu-mir-182,v11	21	28	21	34.5	33	21	21	25
Analyte 438	hsa-mmu-miR-302b,v11	18	25.5	17	26	25	16	15	28
Analyte 439	hairpin-hsa-mir-302b,v11	20.5	27	18	26	22	17	17	27.5
Analyte 441	hsa-mmu-miR-302c,v11	17	30	23	30	31.5	21	19	34
Analyte 451	hairpin-hsa-mir-302c,v11	10	25	21	29	25.5	15	18	26
Analyte 452	hsa-mmu-miR-302d,v11	18	24	22	24	23	13	11	24.5
Analyte 455	hsa-miR-325,v11	19	28	19	24	24.5	14	14	22
Analyte 456	hairpin-hsa-mir-337,v11	17	26	21	28	22.5	16	15	36
Analyte 459	hairpin-hsa-mir-345,v11	17	30	24.5	33	25	17	15	28
Analyte 461	hsa-miR-346,v11	20	35	25	34	33	22	14	34
Analyte 467	hsa-mmu-miR-367,v11	21	29	21	24	27	15	17	38
Analyte 468	hairpin-hsa-mir-376c,v11	19	25	19.5	27	24.5	17	16	29
Analyte 472	hsa-mmu-miR-369-3p,v11	19	30	29	28	30	18	18	29
Analyte 474	hsa-miR-383,v11	7.5	22	18	28	20	12	13	24
Analyte 475	hsa-miR-330-3p,v11	12	26	19	24	23	14	12	25
Analyte 481	precontrol5	95.5	131	35	40	185	94.5	29	31.5
Analyte 485	precontrol4	48.5	74	43	47	108	64	26	35
Analyte 487	precontrol3	1476	4026	178	308	3388	2305.5	699	40
Analyte 488	postcontrol-PTG20210	5630.5	5675	5922	5824	5850	5458	5603.5	5960
Analyte 489	ebv-miR-BART2-5p,v11	36	56	34	43	50	27	26	37
Analyte 492	postcontrol-MRC677	7848	7949	8078	8502	8488	7967	7965.5	8903
Analyte 494	postcontrol-FVR506	6788.5	7036	7199.5	6722	6926	6808	6864	7902.5
Analyte 495	hsa-miR-429,v11	8	5	8	10.5	6	8	7.5	20
Analyte 496	hsa-miR-376a,v11	7	4.5	8	6	4	7	4	19
Analyte 497	hairpin-hsa-mir-378,hairpin-mmu-mir-378,v11	645	1152.5	28	34.5	878	279.5	10	24
Analyte 498	hsa-miR-380,v11	9	8	8	7	13	7	5	20
Analyte 499	hairpin-hsa-mir-422a,v11	12	8.5	8	8	11	7	8	20
Analyte 500	hsa-miR-329,v11	13	10	8	11	9	6	5	26
Analyte 501	hairpin-hsa-mir-453,v11	485	371	292	390	400	564	293	25
Analyte 502	hairpin-hsa-mir-452,v11	6	7	5	6	2	7.5	2.5	20
Analyte 503	hsa-mmu-miR-409-5p,v11	11	10.5	9	10	13	17	11	19
Analyte 504	hsa-miR-376b,v11	7	7	9	7	5	6	6	27
Analyte 505	hsa-miR-485-5p,mmu-miR-485,v11	8	5	7	7	6	5	3	24
Analyte 506	hsa-miR-485-3p,hairpin-mmu-mir-485,v11	11	7	10	8	10	4	7	26
Analyte 507	hairpin-hsa-mir-488,v11	11	9	7	12	6.5	12	13	22
Analyte 508	hsa-miR-489,v11	6	4	4	8.5	10	5	5	18
Analyte 509	hsa-miR-490-3p,mmu-miR-490,v11	1.5	7	5	6	8	2	4	21.5
Analyte 510	hsa-miR-491-5p,mmu-miR-491,v11	8	8	6.5	9	8	4	3	21
Analyte 511	hsa-miR-511,v11	11	9	7	7	12	8	7	27
Analyte 512	hsa-miR-146b-5p,mmu-miR-146b,v11	1803	4078	45	55	2122	635	17.5	24
Analyte 513	mmu-miR-202-5p,hairpin-hsa-mir-202,v11	8.5	8	8	9	6	5	4	28
Analyte 514	hsa-miR-202,v11	10	12	5	8	8	11	3.5	22
Analyte 515	hsa-miR-492,v11	6	7	8	6	9	6	3	23
Analyte 516	hairpin-hsa-mir-493,hairpin-mmu-mir-493,v11	7	8	5	5	9	5	2.5	25
Analyte 517	hairpin-hsa-mir-432,v11	6	7	1	3.5	9	4.5	4	25
Analyte 518	hsa-mmu-miR-494,v11	10	5	6	9	5	6	4	25
Analyte 519	hairpin-hsa-mir-496,hairpin-mmu-mir-496,v11	12	12	6	5	10	9	6	29
Analyte 520	hsa-miR-193b,v11	10	10	10	12.5	13	10	7	24
Analyte 521	hsa-mmu-miR-497,v11	8	8	15	22	15.5	7	6.5	24
Analyte 522	hsa-mmu-miR-181d,v11	458.5	1078	75	127	675	300	13	20
Analyte 523	hsa-miR-512-5p,v11	8	9	6	6	7	7	8	23
Analyte 524	hsa-miR-512-3p,v11	6.5	8	8	8	7	5	4	22.5
Analyte 525	hsa-miR-498,v11	9	8.5	6	8.5	11	4	6.5	23
Analyte 526	hsa-miR-520e,v11	10	12	9	7	10	8	4	18
Analyte 527	hairpin-hsa-mir-519e,v11	8	3	9	6.5	8	5	7	25
Analyte 528	hairpin-hsa-mir-519e,v11	7	6	8	8	1	3	5	24
Analyte 529	hsa-miR-519c-3p,v11	5	4	9	3	4	3	4	22
Analyte 530	hsa-miR-520a-5p,v11	8.5	10	9	7	11	8	6	22
Analyte 531	hsa-miR-520a-3p,v11	8.5	7	8	7	12	5	8	27
Analyte 532	hsa-miR-526b,v11	11	13	7	9	7.5	5	7	27
Analyte 533	hairpin-hsa-mir-526b,v11	13	13	7	4	13	8	6	21
Analyte 534	hsa-miR-519b-3p,v11	1	0	10	25	7	2	4	23
Analyte 535	hsa-miR-525-5p,v11	7	9	8	7	7	5	5	26
Analyte 536	hsa-miR-525-3p,v11	10	15	8	6	12	10	7	25
Analyte 537	hairpin-hsa-mir-518f,v11	9	8	8	5	11.5	7	6	23
Analyte 538	hairpin-hsa-mir-518f,v11	9	9	7	6	6	5	9.5	23
Analyte 539	hairpin-hsa-mir-518c,v11	8.5	10.5	8	8	5	7	3	22
Analyte 540	hsa-miR-518c,v11	4.5	7	5	6	4	6	5	24
Analyte 541	hsa-miR-524-5p,v11	7	7	4.5	7	10	3	8	22
Analyte 542	hsa-miR-524-3p,v11	11	9	9.5	8	10	5	8	23
Analyte 543	hairpin-hsa-mir-517c,v11	8	10	12	12	13	8	6	28
Analyte 544	hsa-miR-520d-5p,v11	9	6	6	10	9	6	9	22
Analyte 545	hsa-miR-520d-3p,v11	8.5	10	8	8	11	4	4	22.5
Analyte 546	hsa-miR-520g,hsa-miR-520h,v11	12	6	7	9	10	6	9	25.5
Analyte 547	hsa-miR-516a-3p,hairpin-hsa-mir-516b,v11	15	9	11	7	12	11	8	22.5
Analyte 548	hsa-miR-518d-3p,v11	8	7	7	3	8	6	6	29
Analyte 549	hairpin-hsa-mir-518a,v11	13	11	9	10	13	8	8	23
Analyte 550	hsa-miR-517c,v11	9.5	10	9	12.5	8	8	4	18.5
Analyte 551	hsa-miR-499-5p,mmu-miR-499,v11	9	8	10	9	6	5	4	21
Analyte 552	hairpin-hsa-mir-500,v11	12	11.5	8	11	6	4	6	25
Analyte 553	hsa-miR-501-5p,v11	13	14	11	8	14	11	9	29
Analyte 554	hsa-miR-770-5p,v11	13	4.5	11.5	12	7	8.5	4	26
Analyte 555	hsa-miR-502-5p,v11	17	25	12	5.5	18	13	6	28
Analyte 556	hsa-miR-503,v11	44	88	14	12	91	29	11	26
Analyte 557	hsa-mmu-miR-504,v11	6	10	8.5	10	13	7	6	26
Analyte 558	hsa-miR-513a-5p,v11	9	13	12	12	9.5	8	10	22.5
Analyte 559	hsa-miR-506,v11	42	42	21	30	41	93	36	22.5
Analyte 560	hsa-miR-507,v11	12.5	9	8	11	13	9	7	22.5
Analyte 561	hsa-miR-508-3p,v11	9	8.5	7	9	8.5	7	7	22.5
Analyte 562	hsa-miR-509-3p,v11	12	9	10	12	8.5	5	7	27
Analyte 563	hsa-miR-510,v11	18	15.5	14	14	17	16	14	29.5
Analyte 564	hsa-miR-514,v11	10.5	10	10	11	14	8	11	22
Analyte 565	hairpin-ebv-mir-bhrf1,v11	8	7	11	20	8	7	4	34
Analyte 566	hairpin-ebv-mir-bhrf1,v11	8	10	10	11.5	4	7	9	31
Analyte 567	ebv-miR-BHRF1-3,v11	8	11	10	9	7	9	9	24
Analyte 568	hsa-miR-618,v11	273	179	148	208	232.5	372	196	22
Analyte 569	hsa-miR-522,v11	8	10	12	9	5	8	7	28
Analyte 570	hsa-mmu-miR-495,v11	8	8	9	9	12.5	7	10	25
Analyte 571	hsa-mmu-miR-543,v11	13	13	13	8	10	10	9	27
Analyte 572	hsa-mmu-miR-451,v11	6	11	9	12	11	7	11	26
Analyte 573	hairpin-hsa-mir-518e,v11	215	163	134	180	187.5	252	151	27
Analyte 574	hsa-miR-519a,v11	11	9	11	11	9	6	11	25.5
Analyte 575	hairpin-hsa-mir-527,v11	13	9	12	9	11	9.5	9	28
Analyte 576	hsa-mmu-miR-151-5p,v11	219	198	160	227	221	240	168	29
Analyte 577	hsa-miR-521,v11	18	16	17	25	17.5	18	16	26
Analyte 578	hsa-miR-483-5p,v11	8	12	10	12	13	9	9	28
Analyte 579	hsa-miR-362-5p,v11	14	19	11	15	16.5	10	15	29
Analyte 580	old_j-mir-16	29	46	19	23	49	26	13	31
Analyte 581	hsa-miR-517a,hairpin-hsa-mir-517b,v11	12	11	12	12	16.5	11	11	30
Analyte 582	hsa-miR-516b,v11	10	11	12	10	12	9.5	9	25
Analyte 583	hsa-miR-518b,v11	15	11	13	14	10	11	10	30
Analyte 584	hairpin-hsa-mir-519d,v11	13	12	11	13	12	10	9	31
Analyte 585	hairpin-hsa-mir-140,hairpin-mmu-mir-140,v11	107	237	27.5	40	146	54	11	30
Analyte 586	hsa-miR-28-3p,v11	18	17	18	19	20	19	14	34
Analyte 587	old_j-mir-47	16.5	16.5	18	18	18	14	15	32
Analyte 588	hairpin-hsa-mir-519a,v11	17	19	14.5	14	16	15	14	37
Analyte 589	hairpin-hsa-mir-26b,hairpin-mmu-mir-26b,v11	143	110	79	119	128	217.5	107.5	36
Analyte 590	hsa-miR-519c-5p,hsa-miR-519b-5p,hairpin-hsa-mir-522,v11	21	15	17	14	19	12	15	32.5
Analyte 591	hairpin-hsa-mir-527,v11	17	13	13	15	17	15	13	35
Analyte 592	hsa-miR-487a,v11	15	17	17	15	20	12	15	29
Analyte 593	hsa-miR-493,v11	20	15	15	16	17	20	16	31
Analyte 594	hsa-miR-523,v11	17	15	16	14	12	12	14	33
Analyte 595	hsa-miR-518a-5p,hsa-miR-527,v11	2	3.5	7	12	6	12	5	22
Analyte 596	hsa-mmu-miR-532-5p,v11	354	625	23	27	397.5	157	10	22
Analyte 597	hsa-miR-455-5p,hairpin-mmu-mir-455,v11	7.5	3	9	10	8	6	6	24
Analyte 598	hsa-mmu-miR-539,v11	7.5	7	9.5	5	5.5	5	5	19
Analyte 599	hsa-miR-544,v11	8	9	8	5	4	5	8	24
Analyte 600	hairpin-hsa-mir-545,v11	4	10.5	10	4	5.5	12	7	21.5
Analyte 601	hsa-mmu-miR-487b,v11	14	5	12	5	9	8	12.5	24
Analyte 602	hsa-miR-551a,v11	8	11	9	10.5	12.5	9	9	22
Analyte 603	hsa-miR-552,v11	7	4	7.5	14	7.5	6	4	14
Analyte 604	hsa-miR-553,v11	14	9	5.5	12	9	12	8	22
Analyte 605	hsa-miR-554,v11	13	12	14	16	19	11	15	32.5
Analyte 606	hsa-mmu-miR-92b,v11	122	247	24	29.5	233	135.5	16.5	32
Analyte 607	hsa-miR-555,v11	14	14	15	16.5	24.5	12	10	32
Analyte 608	hsa-miR-556-5p,v11	9.5	12.5	9	7	18.5	5	23	26.5
Analyte 609	hsa-miR-557,v11	17	14	17	20	19.5	15	16.5	31
Analyte 610	hsa-miR-558,v11	18	16	17	18	16.5	12.5	14.5	36
Analyte 611	hsa-miR-559,v11	21.5	14	22.5	0	26.5	38.5	27.5	20
Analyte 612	NotAvailable	5.5	7	7	8	5.5	6	7	25
Analyte 613	hsa-miR-561,v11	36	27.5	27	34	36	54	25.5	18
Analyte 614	hsa-miR-562,v11	7	4.5	4	7	12	6	4	24
Analyte 615	hsa-miR-563,v11	8	8	6	13	8	7	6	22
Analyte 616	hsa-miR-564,v11	9	6	9	7.5	6	9	9	29
Analyte 617	NotAvailable	11.5	6	4	10	8	6	8	27
Analyte 618	hsa-miR-566,v11	6	7	7	7	1	7	5	21
Analyte 619	hsa-miR-567,v11	8.5	9.5	6	16	7	5.5	7	26.5
Analyte 620	ebv-miR-BHRF1-1,v11	11	7	8	10	9	8	9	22.5
Analyte 621	hsa-mmu-miR-568,v11	7	7	8	8.5	7	5	6	25
Analyte 622	hsa-miR-569,v11	6	9	7	6	9.5	7	8	22.5
Analyte 623	hairpin-hsa-mir-570,v11	6	10	9.5	9	8	6	7	21
Analyte 624	hsa-miR-571,v11	7	8	11	9	8	8	7	27
Analyte 625	hsa-miR-572,v11	11	11	9	12	4	5	5	21.5
Analyte 626	hsa-miR-573,v11	5.5	10	7	9	10	9	12	21
Analyte 627	hsa-mmu-miR-574-3p,v11	8.5	14	13	15	15	12	6	30
Analyte 628	hsa-miR-575,v11	19	11.5	12	18	15	8.5	14	29.5
Analyte 629	hsa-miR-576-5p,v11	106.5	71	54	88	87.5	153.5	80	29
Analyte 630	hsa-miR-577,v11	13	12	12	8.5	14	9	12	31
Analyte 631	hsa-miR-578,v11	16	14	15	20	18	20	18	29.5
Analyte 632	hairpin-hsa-mir-579,v11	16	20	18	18	17	17	13	32.5
Analyte 633	hsa-miR-580,v11	21	21	23	23	22	23	23.5	35.5
Analyte 634	hsa-miR-581,v11	9	5	4.5	11	7.5	9	9	25
Analyte 635	hsa-mmu-miR-582-5p,v11	29	23	22	26	27	38	23	20
Analyte 636	hsa-miR-583,v11	7	7	6	7	10	9	4	21
Analyte 637	hsa-miR-584,v11	7	6	9	4	6	5	6	23
Analyte 638	hsa-miR-585,v11	9	8	8	7	7	8	6	21.5
Analyte 639	hsa-miR-548a-3p,v11	5.5	10	7	10	4	7	5	19
Analyte 640	hsa-miR-586,v11	9	7	11	13	10	11	6	26
Analyte 641	hsa-miR-587,v11	13	4	8	8	7	8	3	28
Analyte 642	hsa-miR-548b-3p,v11	11	12	11	14	9	5	9.5	27
Analyte 643	hsa-miR-588,v11	6	11	7	8.5	9.5	6	7	26.5
Analyte 644	hairpin-hsa-mir-589,v11	9.5	9	10	11	11	7	10	21
Analyte 645	hairpin-hsa-mir-550,v11	11	10	7	10	11	10	10	29
Analyte 646	hsa-miR-591,v11	6	11	13	9	12	9	9	30
Analyte 647	hsa-mmu-miR-592,v11	15	15	13	11	15	11	13	30
Analyte 648	hairpin-hsa-mir-593,v11	12	11	10	11	13.5	10	12	27.5
Analyte 649	NotAvailable	15	15	13	14	10	9	12	29.5
Analyte 650	hsa-miR-595,v11	17	16	16	17	19	15	13	34
Analyte 651	hsa-miR-596,v11	14	14	16	16	18	15	15	32
Analyte 652	hsa-miR-597,v11	22	24	19.5	24	21	22	20	35
Analyte 653	hsa-miR-598,v11	15	13	12	14	10	10	4	24
Analyte 654	hsa-miR-599,v11	11	8	11	10	8	7	6	22
Analyte 655	hsa-miR-600,v11	9	11	10	5	13	6	9	26
Analyte 656	hsa-miR-601,v11	12	8	11	6	8	9	7	25
Analyte 657	hsa-miR-602,v11	10	8	9	10	11	6	6	27
Analyte 658	hsa-miR-603,v11	10	11	11	16	9	10	10	29
Analyte 659	hsa-miR-604,v11	11	9	12	14	10	13.5	10	27.5
Analyte 660	hsa-miR-605,v11	16	10	10	9	12	7	6	29
Analyte 661	hsa-miR-606,v11	15	12	14	7	13	13	11	26
Analyte 662	hsa-miR-607,v11	19	15	13	17	16.5	29	22	29
Analyte 663	hsa-miR-608,v11	14	12	13	15.5	10	9	12	24
Analyte 664	hsa-miR-609,v11	11	9.5	12	10	9	11.5	11	23
Analyte 665	hsa-miR-610,v11	11	11	11.5	12	13	10	15	31
Analyte 666	hsa-miR-611,v11	18.5	9	12	9.5	16	10	10	28
Analyte 667	hsa-miR-612,v11	14	18	20	14	14	13	15	38
Analyte 668	hsa-miR-613,v11	13	11	13	13	11	9	11	26
Analyte 669	hsa-miR-614,v11	44	47	51	45	49	30	39	67
Analyte 670	hsa-mmu-miR-615-3p,v11	16	12	14.5	13	12	10	13	34
Analyte 671	hairpin-hsa-mir-616,v11	19	11.5	19	13	6	14	12	31
Analyte 672	hsa-miR-548c-3p,v11	9	14	13.5	15	11.5	10.5	14	27
Analyte 673	hsa-miR-617,v11	15	13	15	12	9	12.5	12	32
Analyte 674	hsa-miR-619,v11	13	12	14	14	19	13	10	29.5
Analyte 675	hsa-miR-620,v11	15	16	17	13.5	16	13	12	31
Analyte 676	hsa-miR-621,v11	14	14	12	18	17	17	13.5	25
Analyte 677	hsa-miR-622,v11	17	10.5	16	15	11	11	13	29
Analyte 678	hsa-miR-623,v11	16	20	18	17	17	16	14	32
Analyte 679	hairpin-hsa-mir-624,v11	15	19	18	17	18	17	16	35.5
Analyte 680	hsa-miR-625,v11	2949.5	2585.5	2496	2496	2541	2532	2065.5	32
Analyte 681	hsa-miR-626,v11	16	19	16	15	20	14	17	32
Analyte 682	hsa-miR-627,v11	21	17	16	19	15	18	16	29
Analyte 683	hsa-miR-628-3p,v11	45	42	37	41	43	49	35	32.5
Analyte 684	hairpin-hsa-mir-629,v11	22	21.5	23	24	18	18	19.5	33
Analyte 685	hsa-miR-630,v11	16	20.5	18	18.5	16	20	17	32
Analyte 686	hsa-miR-631,v11	14.5	17.5	15	20	19	16	15.5	36
Analyte 687	hsa-miR-632,v11	16.5	21	20	23	18	20	20	31
Analyte 688	hsa-miR-633,v11	22.5	22	26	20	18	20	17.5	38
Analyte 689	hsa-miR-634,v11	19	19	22	24.5	23	21	16	33
Analyte 690	hsa-miR-635,v11	61.5	59	67	57.5	51	41	54.5	93
Analyte 691	hairpin-hsa-mir-636,v11	21.5	23	26	24	22	23	23	36
Analyte 692	hsa-miR-637,v11	8	3	7	5	4.5	7	7	19
Analyte 693	hsa-miR-638,v11	6	9.5	8	6	8	8	3	21.5
Analyte 694	hsa-miR-639,v11	5.5	6	4	9	4	6	3	20
Analyte 695	hsa-miR-640,v11	8.5	6	7.5	4	6.5	6	5	26
Analyte 696	hsa-miR-641,v11	10	6	6	7.5	7	7	7	23.5
Analyte 697	hsa-miR-642,v11	7	8	10	8	9	7	6.5	21
Analyte 698	hsa-miR-643,v11	7	9	8	9	11	4	9	19
Analyte 699	hsa-miR-644,v11	7	7	8	7	8	7	7	22
Analyte 700	hsa-miR-645,v11	10	6	10	6.5	9	7	6	25
Analyte 701	hsa-miR-646,v11	6	6	9	7	7	6.5	8	28
Analyte 702	hsa-miR-647,v11	8.5	7	8.5	6	10	12	8	20.5
Analyte 703	hsa-miR-648,v11	10	8	9	12.5	6.5	10	9	28
Analyte 704	hsa-miR-649,v11	111	92	83	95	90	95	69	30
Analyte 705	hsa-miR-650,v11	18	10	10	13.5	11.5	11	7.5	32
Analyte 706	hsa-miR-651,v11	15.5	8	8	10	13	10	8	24
Analyte 707	hairpin-hsa-mir-652,hairpin-mmu-mir-652,v11	47	84.5	12.5	11	61	21.5	8	22.5
Analyte 708	hsa-miR-548d-3p,v11	14	9	10	11	7.5	8	10	23.5
Analyte 709	hsa-miR-661,v11	12	11	9	13	13	6	9	27
Analyte 710	hsa-miR-662,v11	14	6	9	11	8	8.5	9	25.5
Analyte 711	hsa-miR-663,v11	12	12	10	11	9	6	9	30
Analyte 712	hsa-miR-449b,v11	77	206	16	18	48	21	10	23
Analyte 713	hairpin-hsa-mir-653,hairpin-mmu-mir-653,v11	9.5	12	10	9	12	12	7	26
Analyte 714	hsa-mmu-miR-411,v11	13	12	14	15	10	11	11	31
Analyte 715	hsa-miR-654-5p,v11	9	10	15	14	6.5	12	8	30
Analyte 716	hsa-miR-655,v11	12.5	15	13	11	11	16	11	33
Analyte 717	hsa-miR-656,v11	40	33	25.5	33	35	61	25	31.5
Analyte 718	hsa-miR-549,v11	9.5	12.5	12	13	21	16	9	27
Analyte 719	hsa-miR-657,v11	18	21	18	20	22	23	17	32
Analyte 720	hsa-miR-658,v11	16	15.5	9	11	13	15	13	30.5
Analyte 721	hsa-miR-659,v11	25	26	20	29	19.5	23.5	22	32
Analyte 722	hsa-miR-660,v11	14	13	14	11	16	11	14	27
Analyte 723	hsa-mmu-miR-421,v11	75	229	20	27	193	80.5	15	26
Analyte 724	hsa-miR-542-5p,hairpin-mmu-mir-542,v11	16	17	17	13	19	12	13	30
Analyte 725	hsa-mmu-miR-542-3p,v11	109.5	264	23	24.5	212.5	60	15.5	28
Analyte 726	hsa-mmu-miR-758,v11	15	18	19	11.5	18.5	16	16	33
Analyte 727	hsa-mmu-miR-668,v11	17	15	16	15	15	15	16	34.5
Analyte 728	hsa-miR-767-5p,v11	16.5	18.5	16	18	18	16	16.5	31
Analyte 729	hsa-miR-767-3p,v11	16	19	17	20	17.5	18	16	33.5
Analyte 730	hairpin-hsa-mir-454,v11	18	19	19	19.5	21	16	17	29
Analyte 731	hairpin-hsa-mir-454,v11	25	19	19	22	20	18	17	36
Analyte 732	hsa-miR-769-5p,v11	19	17	21.5	19	15	18	17.5	31.5
Analyte 733	hsa-miR-769-3p,v11	14	14	17	14	15	14	14	28
Analyte 734	hsa-miR-766,v11	23	21	22	22	24	25	16	34
Analyte 735	hsa-miR-802,hairpin-mmu-mir-802,v11	18	23	22	25	22	21	19	36
Analyte 736	hsa-miR-765,v11	17	14	14	19	17.5	16	15	27
Analyte 737	hsa-mmu-miR-874,v11	13	18	19	21	19	16	15	37.5
Analyte 738	hairpin-hsa-mir-29b,hairpin-mmu-mir-29b,v11	21.5	26	25.5	20	27.5	21	20	32
Analyte 739	hairpin-hsa-let-7g,hairpin-mmu-let-7g,v11	9	6	6.5	8	6	2	6	30
Analyte 740	hsa-miR-518a-3p,v11	8	8	7	8.5	6	4	6	25
Analyte 741	hsa-miR-523,v11	5	6	8.5	4.5	8	5	6	20
Analyte 742	old_j-mir-6	11	10	12	14	10	14	8	19
Analyte 743	hsa-mmu-miR-590-5p,v11	10.5	7	10.5	6	10	8	10	26
Analyte 744	hsa-miR-515-3p,v11	10	7	10	11	10	7	7	24
Analyte 745	hairpin-hsa-mir-146b,v11	16	12	12	9	9	11	11.5	31
Analyte 746	old_j-mir-10	12	11	10	9	11	11	5	26
Analyte 747	hsa-mmu-miR-551b,v11	8	11	10	10	10	7	7	28.5
Analyte 748	old_j-mir-46	9	9.5	16	15.5	12	11.5	12	34
Analyte 749	hairpin-hsa-mir-222,hairpin-mmu-mir-222,v11	14	20	14	16	19	11	10	28
Analyte 750	old_j-mir-4	12	12	14	13	18	12	5	32
Analyte 751	hsa-mmu-miR-877,v11	14	17	10.5	10	23	14	12	25
Analyte 752	hsa-miR-33b,v11	13	13	15	13	15	11	10	27.5
Analyte 753	hairpin-hsa-mir-24,v11	15	20	16	14	19	14	12	26
Analyte 754	hairpin-hsa-mir-487a,v11	10	14	16	11	17.5	9	11	29
Analyte 755	hairpin-hsa-mir-503,v11	39	33.5	27	31	39	38.5	29	32
Analyte 756	hsa-miR-1323,v11	20	18	14	17	14	13	13	35
Analyte 757	hairpin-hsa-mir-505,v11	18.5	18	15	16	19	18	16	33
Analyte 758	hsa-miR-483-3p,v11	21	19	22	18	17	20	19	36.5
Analyte 759	hsa-mmu-miR-484,v11	34	48	19	15	45	22	13	25.5
Analyte 760	hsa-miR-486-5p,mmu-miR-486,v11	38	83	17	18	60	34	15	29.5
Analyte 761	hairpin-hsa-mir-18a,hairpin-mmu-mir-18a,v11	40	61	38	35	64	36	32	51
Analyte 762	hsa-mmu-miR-363,v11	6	5	5	6	9	4	2	25
Analyte 763	hairpin-hsa-mir-19b,hairpin-mmu-mir-19b,v11	16	32	10	11	32	12	5	24
Analyte 764	hairpin-hsa-mir-1307,v11	9	10	8	9	8	8	10	23.5
Analyte 765	hairpin-hsa-mir-520c,v11	14	11	12	8	10	9	8	27
Analyte 766	hairpin-hsa-mir-23a,hairpin-mmu-mir-23a,v11	18	11	14	15	15	8	8	24
Analyte 767	hsa-miR-1185,v11	13	12.5	13	9	12	11.5	11	28
Analyte 768	hsa-mmu-miR-369-5p,v11	8.5	10	13	10	13	13	11	25
Analyte 769	hsa-miR-339-3p,v11	21	17	17	18	19	15	13	33
Analyte 770	hairpin-hsa-mir-671,hairpin-mmu-mir-671,v11	17	14.5	12.5	13	13	13	13	31
Analyte 771	hsa-mmu-miR-342-5p,v11	14	14	15	13	13	9	12	24
Analyte 772	hairpin-hsa-mir-19a,hairpin-mmu-mir-19a,v11	15	20	15	14	21	11	10.5	29
Analyte 773	hairpin-hsa-mir-1307,v11	15	16	15	17	17	14	13	34
Analyte 774	hsa-mmu-miR-423-5p,v11	183.5	398	29	38	272	72	17	38
Analyte 775	hsa-miR-542-5p,hairpin-mmu-mir-542,v11	14	12	11	12	12	12	9	19
Analyte 776	hsa-miR-1283,v11	10.5	11	6	9	11	10	11	29
Analyte 777	hsa-miR-942,v11	10	10	11	13	10	8	9	28
Analyte 778	hsa-miR-432,v11	9	9	12	8	11	11	8.5	26
Analyte 779	hsa-mmu-miR-425,v11	93	328	17.5	17	219	54	9	25
Analyte 780	hairpin-hsa-mir-92a,v11	15	17	16	20	15	11	12	35
Analyte 781	hsa-miR-193a-5p,v11	10	14	13	14	10	13	12	27
Analyte 782	hsa-miR-515-5p,v11	16	16	18	14.5	17	14	17	34
Analyte 783	hsa-miR-516a-5p,v11	6.5	11	10.5	12	11	6	6	27
Analyte 784	hairpin-hsa-mir-30d,hairpin-mmu-mir-30d,v11	24.5	34	13.5	16	29.5	20	11.5	24
Analyte 785	precontrol5	87.5	110	22	28.5	155	75	25	29.5
Analyte 786	precontrol4	43	62	27.5	30	90	49	19	35
Analyte 787	precontrol3	1455	3781	127.5	239	3242	2054	598	29.5
Analyte 788	postcontrol-PTG20210	5500.5	5304	5430.5	5374	5382	5281.5	5462	5871
Analyte 789	hsa-miR-768-5p,v11	18.5	23	21.5	23	23	21	19	28
Analyte 790	postcontrol-MRC677	7837	7803.5	8004	7890	7689.5	7584.5	7692	8704
Analyte 791	postcontrol-FVR506	6818	6752	7060	6864.5	6789	6743	6767	8071.5
